# Supplementary material
Source: MDPI journal article supplement (https://www.mdpi.com/1999-4907/8/3/91)
Supplement: s1 [file s1]

**Supplemental Materials: Phenotypic Plasticity Explains Response Patterns of European Beech (Fagus Sylvatica L.) Saplings to Nitrogen Fertilization and Drought Events**

**Christoph Dziedek, Andreas Fichtner, Leonor Calvo, Elena Marcos, Kirstin Jansen, Matthias Kunz, David Walmsley, Goddert von Oheimb and Werner Härdtle**

2. Materials and Methods

2.1. Seed Collection

*Fagus sylvatica* seeds were collected across seven forest sites on north-facing slopes in the Cantabrian Mountains (NW Spain; Figure 1) in autumn 2009 (distances between sampling sites were 3–50 km; for forest site characteristics see Table S1 and Dziedek et al. [31]).

**Table S1.** Climatic conditions for the seven forest locations in the Cantabrian Mountains (North Spain), from which *Fagus sylvatica* seeds were sampled in 2009 (from Dziedek et al. [31]).

| Location | Elevation a.s.l. (approximate) | Mean annual temperature | Mean annual precipitation | Mean precipitation in the growing season |
| --- | --- | --- | --- | --- |
|
| 1 | 1375 m | 8.8°C (b) | 1221 mm (b) | 417 mm (b) |
| 2 | 1400 m | 10.1°C (a) | 920 mm (a) | 333 mm (a) |
| 3 | 1275 m | 8.8°C (b) | 1221 mm (b) | 417 mm (b) |
| 4 | 1150 m | 9.1°C (c) | 1279 mm (c) | 432 mm (c) |
| 5 | 1375 m | 10.1°C (a) | 920 mm (a) | 333 mm (a) |
| 6 | 1300 m | 8.8°C (b) | 1221 mm (b) | 417 mm(b) |
| 7 | 1300 m | 10.1°C (a) | 920 mm (a) | 333 mm(a) |

(a)Weather station in Boñar from 1987 to 2006; (b)weather station in Boca de Huergano from 1988 to 2007; (c)weather station in Prioro from 1987 to 2006 (Instituto Nacional de Meteorología, España). Distances between sampling sites were 3–50 km, and distances between weather stations and sampling were between 5 and 11 km; the prevailing soil type at the forest sites sampled is a humic cambisols; chemical soil properties based on means of four samples (±1 SE): litter layer depth: 8.6 cm (1.8), pH(H2O): 4.3 (0.5), C:N ratio: 14.2 (1.0), cation exchange capacity: 9.9 cmol kg‑1 (2.0); data from Marcos et al. [1]; plant community: Blechno spicanti-Fagetum sensu Rivas-Martinez [2].

3. Results

3.1. Effects of N, D, and ND Treatments on Two-Year-Old Saplings

N and ND treatments caused a significant increase in the aboveground biomass production (in terms of stem increment, leaf biomass increment, and total aboveground biomass), but had no significant effect on the belowground biomass (Tables 1 and S2). Moreover, the plants’ height increment increased in the ND treatment in comparison to the controls. The relative increase in the aboveground biomass allocation resulted in significantly higher shoot:root ratios in the N and ND treatments (Table S2). Branch dieback was significant only in the ND treatment (*p* = 0.006), whereas N fertilization reduced the number of necrotic leaves (negative estimate; Table 1). N fertilization caused a distinct increase in N concentrations, which in turn resulted in decreasing C:N ratios (Tables 1 and S2). Leaf δ13C signatures were not significantly affected by N fertilization. D treatments had no effect on morphological responses, but caused decreasing values for C concentrations, N concentrations, and leaf δ13C signatures (Tables 1 and S2).

**Table S2.** Treatment effects on response variables (means, ± SE in brackets) of two-year-old beech saplings. Abbreviations: D = drought treatment, N = nitrogen treatment, ND = combined nitrogen and drought treatment; DW = dry weight.

| Response variables | Control | | D | | N | | ND | |
| --- | --- | --- | --- | --- | --- | --- | --- | --- |
| Stem increment (mm yr-1) | 1.86 | (0.07) | 1.90 | (0.06) | 2.46 | (0.08) | 2.47 | (0.08) |
| Height increment (cm yr-1) | 3.90 | (0.69) | 3.88 | (0.59) | 5.90 | (0.69) | 6.45 | (0.68) |
| Leaf biomass increment (g DW yr-1) | 2.56 | (0.11) | 2.71 | (0.10) | 2.95 | (0.12) | 3.01 | (0.13) |
| Aboveground biomass (g DW) | 18.13 | (0.60) | 18.77 | (0.52) | 20.84 | (0.69) | 21.73 | (0.70) |
| Belowground biomass (g DW)3 | 15.13 | (0.81) | 15.57 | (0.72) | 16.16 | (1.00) | 16.90 | (0.96) |
| Shoot:root ratio | 1.20 | (0.05) | 1.18 | (0.04) | 1.37 | (0.04) | 1.34 | (0.06) |
| No. necrotic leaves | 2.67 | (0.93) | 3.00 | (0.97) | 1.04 | (0.19) | 1.31 | (0.27) |
| No. dead branches | 1.15 | (0.20) | 1.01 | (0.14) | 1.38 | (0.21) | 2.01 | (0.54) |
| Leaf C concentration (g kg-1) | 463.23 | (0.98) | 459.48 | (0.93) | 460.75 | (0.91) | 460.76 | (1.00) |
| Leaf N concentration (g kg-1) | 15.36 | (0.27) | 14.08 | (0.21) | 18.57 | (0.31) | 18.01 | (0.25) |
| Leaf CN ratio | 30.87 | (0.52) | 33.17 | (0.47) | 25.37 | (0.44) | 25.98 | (0.38) |
| Leaf δ13C signature | -29.05 | (0.09) | -29.24 | (0.08) | -29.14 | (0.08) | -28.97 | (0.06) |

**Supplementary Materials:** The following are available online at http://www.mdpi.com/journal/forests, Table S1: Site characteristics (from Dziedek et al. [31]), Table S2: Summary of treatment effects on the response variables measured, Table S3: Data for two-year-old trees, Table S4: Data for one-year-old and two-year-old trees (comparisons of shoot:root ratios and leaf δ13 signatures). References [1,2] are cited in the supplementary materials”).

**Table S3**: Data for two-year-old trees

| **Ident_no** | **Forest-site** | **Treatment** | **Stem_Diam_2010** | **Height_2010** | **Stem_Diam_2011** | **Height_2011** | **Stem_incr** | **Height_incr** | **Leaf_biom_incr** | **DW_Stem** | **DW_Leaves** | **DW_Above** | **DW_Below** | **No_Branches_2011** | **No_Dead_Branches_2011** | **No_necr_leeaves** | **Leaf_N** | **Leaf_C** | **Leaf_CN** | **Leaf_d13C** |
| --- | --- | --- | --- | --- | --- | --- | --- | --- | --- | --- | --- | --- | --- | --- | --- | --- | --- | --- | --- | --- |
| 1 | 1 | C | 5.4 | 44 | 7.03 | 48 | 1.63 | 4 | 0.13 | 9.42 | 2.87 | 12.29 | 14.23 | 5 | 3 | 2 | 18.9 | 471.45 | 24.92 | -29.37 |
| 2 | 1 | C | 5.15 | 46.2 | 6.54 | 41.2 | 1.39 | -5 | 1.1 | 6.72 | 2.45 | 9.17 | 8.65 | 11 | 9 | 6 | 20.3 | 466.7 | 23 | -29.06 |
| 3 | 1 | C | 5.4 | 50.5 | 7.08 | 59.3 | 1.68 | 8.8 | 1.38 | 11.63 | 3.3 | 14.93 | NA | 18 | 1 | 0 | 16.3 | 472.2 | 29.04 | -28.66 |
| 4 | 1 | C | 5.68 | 50.6 | 7.45 | 43.8 | 1.77 | -6.8 | 1.49 | 13.04 | 3.87 | 16.91 | 12.7 | 15 | 5 | 2 | 19 | 471.5 | 24.81 | -28.11 |
| 5 | 1 | C | 5.32 | 43.9 | 6.8 | 44.2 | 1.48 | 0.3 | 1.98 | 8.91 | 3.33 | 12.24 | NA | 18 | 4 | 1 | 20.4 | 471.2 | 23.11 | -28.56 |
| 6 | 1 | C | 5.56 | 63.2 | NA | NA | NA | NA | NA | NA | NA | NA | NA | NA | NA | NA | NA | NA | NA | NA |
| 7 | 1 | C | 6.36 | 47.5 | 9.68 | 47.5 | 3.32 | 0 | 2.98 | 18.96 | 5.25 | 24.21 | NA | 22 | 0 | 0 | 17.7 | 461.6 | 26.03 | -30.13 |
| 8 | 1 | C | 6.52 | 39.5 | 8.49 | 46.5 | 1.97 | 7 | 2.54 | 13.14 | 4.59 | 17.73 | NA | 19 | 0 | 0 | 18.6 | 469.5 | 25.29 | -28.64 |
| 9 | 1 | C | 5.94 | 47.5 | 7.72 | 48.4 | 1.78 | 0.9 | 2.53 | 12.35 | 4.24 | 16.59 | NA | 20 | 4 | 4 | 17.3 | 464.1 | 26.79 | -29.07 |
| 10 | 1 | C | 4.87 | 38.9 | 6.47 | 41.5 | 1.6 | 2.6 | 0.42 | 6.41 | 1.86 | 8.27 | 5.47 | 14 | 4 | 6 | 19.8 | 478.4 | 24.14 | -29.29 |
| 11 | 1 | C | 4.78 | 41.3 | 6.54 | 31.3 | 1.76 | -10 | -0.76 | 6.55 | 2.07 | 8.62 | NA | 13 | 7 | 6 | 20.1 | 475.5 | 23.66 | -27.45 |
| 12 | 1 | C | 6.07 | 39.4 | 7.73 | 45.4 | 1.66 | 6 | 2.1 | 12.89 | 4.6 | 17.49 | NA | 25 | 2 | 10 | 17.1 | 465.1 | 27.13 | -28.39 |
| 13 | 2 | C | 6.07 | 50.4 | 7.23 | 50.5 | 1.16 | 0.1 | 1.92 | 10.62 | 2.92 | 13.54 | NA | 18 | 0 | 3 | 14.9 | 468.6 | 31.47 | -28.6 |
| 14 | 2 | C | 7.21 | 73.6 | 8.56 | 75.5 | 1.35 | 1.9 | 3.02 | 18.11 | 4.95 | 23.06 | NA | 22 | 0 | 0 | 11.8 | 475.8 | 40.27 | -27.85 |
| 15 | 2 | C | 6.66 | 64.3 | 7.63 | 60.8 | 0.97 | -3.5 | 2.5 | 13.93 | 5.11 | 19.04 | 13.4 | 27 | 1 | 0 | 12.4 | 455.9 | 36.84 | -29.87 |
| 16 | 2 | C | 6.09 | 51.2 | 7.3 | 50 | 1.21 | -1.2 | 1.68 | 10.16 | 2.93 | 13.09 | NA | 19 | 0 | 0 | 13.1 | 453.3 | 34.71 | -27.91 |
| 17 | 2 | C | 5.44 | 42.2 | 6.47 | 46.8 | 1.03 | 4.6 | 1.28 | 9.48 | 3.53 | 13.01 | NA | 10 | 0 | 0 | 12.9 | 456.5 | 35.5 | -29.29 |
| 18 | 2 | C | 6.29 | 53.7 | 8.39 | 55.8 | 2.1 | 2.1 | 3.69 | 16.73 | 5.04 | 21.77 | NA | 13 | 2 | 1 | 11.5 | 458.2 | 39.85 | -29.35 |
| 19 | 2 | C | 6.78 | 53.4 | 8.51 | 53.2 | 1.73 | -0.2 | 2.41 | 14.49 | 3.89 | 18.38 | NA | 23 | 0 | 2 | 12.5 | 457.8 | 36.77 | -29.97 |
| 20 | 2 | C | 5.72 | 50.5 | 7.02 | 50.4 | 1.3 | -0.1 | 2.55 | 12.85 | 4.34 | 17.19 | 11.32 | 20 | 0 | 2 | 11.7 | 463.6 | 39.76 | -29.86 |
| 21 | 2 | C | 6.96 | 40.4 | 8.55 | 44.5 | 1.59 | 4.1 | 2.68 | 14.74 | 5.09 | 19.83 | 18.52 | 13 | 0 | 1 | 12.95 | 463.9 | 35.93 | -28.54 |
| 22 | 2 | C | 5.73 | 42.4 | 7.35 | 46.5 | 1.62 | 4.1 | 3.36 | 12.45 | 4.56 | 17.01 | NA | 19 | 1 | 3 | 14.5 | 465.6 | 32.19 | -29.73 |
| 23 | 2 | C | 6.33 | 34.5 | 8.15 | 37.7 | 1.82 | 3.2 | 2.36 | 12.36 | 4.2 | 16.56 | 16.52 | 25 | 0 | 0 | 15.2 | 460.3 | 30.3 | -28 |
| 24 | 2 | C | 5.42 | 54.4 | 6.74 | 52.8 | 1.32 | -1.6 | 2.19 | 9.34 | 3.22 | 12.56 | NA | 19 | 1 | 0 | 13.3 | 464.5 | 34.94 | -28.91 |
| 25 | 3 | C | 7.25 | 45.7 | 8.88 | 56.3 | 1.63 | 10.6 | 4.18 | 17.63 | 6.42 | 24.05 | NA | 22 | 2 | 0 | 13.8 | 465.5 | 33.67 | -30.92 |
| 26 | 3 | C | 7.67 | 49.4 | 8.55 | 60.2 | 0.88 | 10.8 | 2.75 | 15.24 | 5.02 | 20.26 | NA | 20 | 0 | 0 | 13.1 | 464.4 | 35.54 | -29.01 |
| 27 | 3 | C | 5.7 | 42.5 | 7.5 | 61.8 | 1.8 | 19.3 | 3.4 | 15.83 | 5.37 | 21.2 | 15.31 | 21 | 0 | 7 | 12.7 | 442.3 | 34.79 | -29.95 |
| 28 | 3 | C | 7.74 | 45.4 | 8.57 | 46.5 | 0.83 | 1.1 | 3.09 | 13.88 | 4.67 | 18.55 | 14.98 | 23 | 3 | 1 | 13.5 | 457.1 | 33.85 | -29.33 |
| 29 | 3 | C | 4.49 | 29.5 | 6.78 | 34.2 | 2.29 | 4.7 | 2.05 | 7.91 | 2.88 | 10.79 | NA | 10 | 0 | 0 | 16.6 | 454.4 | 27.31 | -29.25 |
| 30 | 3 | C | 7.24 | 41.2 | 8.89 | 48.4 | 1.65 | 7.2 | 3.16 | 16.85 | 5.34 | 22.19 | NA | 29 | 0 | 0 | 15.4 | 471.2 | 30.69 | -28.58 |
| 31 | 3 | C | 7.4 | 57 | 9.4 | 65 | 2 | 8 | 3.43 | 19.04 | 5.13 | 24.17 | NA | 25 | 0 | 0 | 12.9 | 465.9 | 36.17 | -29.16 |
| 32 | 3 | C | 6.07 | 36.2 | 7.53 | 34.4 | 1.46 | -1.8 | 3.54 | 11.13 | 3.94 | 15.07 | 13.91 | 12 | 0 | 0 | 15.2 | 464.1 | 30.57 | -28.5 |
| 33 | 3 | C | 5.06 | 26.3 | 7.22 | 30.5 | 2.16 | 4.2 | 2.51 | 8.4 | 3.07 | 11.47 | NA | 7 | 1 | 8 | 17.6 | 472.4 | 26.84 | -29.52 |
| 34 | 3 | C | 5.92 | 36.9 | 8.1 | 41.1 | 2.18 | 4.2 | 3.29 | 12.45 | 4.42 | 16.87 | 16.7 | 16 | 0 | 0 | 14.6 | 469 | 32.21 | -30.48 |
| 35 | 3 | C | 7.18 | 59.4 | 8.07 | 59.2 | 0.89 | -0.2 | 4.2 | 16.79 | 5.66 | 22.45 | NA | 21 | 0 | 0 | 11.8 | 467.2 | 39.57 | -29.6 |
| 36 | 3 | C | 6.58 | 44.3 | 7.61 | 46.7 | 1.03 | 2.4 | 2.54 | 12.11 | 4.64 | 16.75 | NA | 17 | 0 | 0 | 13.7 | 498.7 | 36.4 | -29.18 |
| 37 | 4 | C | 5.01 | 55.8 | 7.95 | 51 | 2.94 | -4.8 | 1.11 | 12.46 | 2.92 | 15.38 | NA | 17 | 1 | 2 | 16 | 463.6 | 28.92 | -27.97 |
| 38 | 4 | C | 5.96 | 35.1 | 7.85 | 45.3 | 1.89 | 10.2 | 3.44 | 12.13 | 5.02 | 17.15 | NA | 27 | 1 | 6 | 13.3 | 460.1 | 34.49 | -27.99 |
| 39 | 4 | C | 5.84 | 46.2 | NA | NA | NA | NA | NA | NA | NA | NA | 14.25 | NA | NA | NA | NA | NA | NA | NA |
| 40 | 4 | C | 6.09 | 45.8 | 9.52 | 61 | 3.43 | 15.2 | 4.51 | 21.37 | 6.66 | 28.03 | 17.66 | 32 | 0 | 1 | 13.25 | 457 | 34.46 | -29.25 |
| 41 | 4 | C | 5.64 | 48.8 | 7.64 | 50.7 | 2 | 1.9 | 2.75 | 12.65 | 3.99 | 16.64 | 15.39 | 21 | 0 | 0 | 13.5 | 455.7 | 33.72 | -28.06 |
| 42 | 4 | C | 7.05 | 58.4 | 10.47 | 64.5 | 3.42 | 6.1 | 3.85 | 25.51 | 5.75 | 31.26 | NA | 20 | 0 | 0 | 14.9 | 448.4 | 30.11 | -29.31 |
| 43 | 4 | C | 6.83 | 66.6 | 9.07 | 58.4 | 2.24 | -8.2 | 2.63 | 17.6 | 4.22 | 21.82 | NA | 13 | 5 | 2 | 17.5 | 471.7 | 26.94 | -27.62 |
| 44 | 4 | C | 6.62 | 55.5 | 10.1 | 60 | 3.48 | 4.5 | 2.94 | 20.6 | 5.65 | 26.25 | NA | 26 | 0 | 1 | 12.5 | 454 | 36.36 | -28.27 |
| 45 | 4 | C | 6.15 | 62.4 | 7.72 | 63.8 | 1.57 | 1.4 | 2.49 | 13.81 | 5.61 | 19.42 | NA | 36 | 0 | 73 | 11.6 | 453.1 | 39.13 | -29.57 |
| 46 | 4 | C | 5.62 | 52.8 | 7.44 | 49.4 | 1.82 | -3.4 | 1.85 | 10.22 | 3.4 | 13.62 | NA | 15 | 5 | 1 | 16.9 | 451.6 | 26.76 | -28.58 |
| 47 | 4 | C | 7.29 | 60.5 | 9.04 | 65.4 | 1.75 | 4.9 | 4.17 | 22.2 | 6.33 | 28.53 | 15.1 | 29 | 1 | 0 | 13.3 | 447.1 | 33.72 | -29.75 |
| 48 | 4 | C | 6.78 | 41.3 | 8.29 | 43.4 | 1.51 | 2.1 | 2.31 | 14.12 | 4 | 18.12 | NA | 24 | 5 | 18 | 13.7 | 458 | 33.51 | -28.51 |
| 49 | 5 | C | 5.03 | 24.9 | 6.59 | 29.5 | 1.56 | 4.6 | 1.85 | 6.62 | 2.37 | 8.99 | NA | 15 | 0 | 0 | 15.3 | 456.3 | 29.91 | -29.06 |
| 50 | 5 | C | 7 | 43.2 | 9.42 | 52.8 | 2.42 | 9.6 | 3.54 | 18 | 5 | 23 | 19.14 | 27 | 0 | 2 | 12.7 | 461.4 | 36.32 | -28.81 |
| 51 | 5 | C | 7.05 | 52.8 | 10.04 | 63.3 | 2.99 | 10.5 | 3.54 | 25.17 | 6.1 | 31.27 | NA | 21 | 0 | 0 | 13.3 | 462 | 34.68 | -28.91 |
| 52 | 5 | C | 6.76 | 39.5 | 8.71 | 48.8 | 1.95 | 9.3 | 3.28 | 13.55 | 5.54 | 19.09 | NA | 26 | 1 | 3 | 16.5 | 454.8 | 27.56 | -28.28 |
| 53 | 5 | C | 6.11 | 49 | 7.68 | 50.8 | 1.57 | 1.8 | 2.98 | 14.15 | 4.33 | 18.48 | 13.79 | 19 | 0 | 0 | 13.9 | 460.3 | 33.1 | -28.45 |
| 54 | 5 | C | 6.8 | 47.4 | 8.06 | 47.9 | 1.26 | 0.5 | 2.73 | 13.26 | 4.62 | 17.88 | NA | 24 | 0 | 3 | 12.7 | 466.6 | 36.64 | -28.53 |
| 55 | 5 | C | 6.04 | 49.6 | 7.43 | 55.5 | 1.39 | 5.9 | 3.21 | 12.84 | 4.35 | 17.19 | NA | 15 | 3 | 3 | 16.4 | 459.5 | 27.98 | -29.21 |
| 56 | 5 | C | 7.35 | 41.5 | 8.87 | 47 | 1.52 | 5.5 | 3.63 | 15.34 | 4.55 | 19.89 | NA | 35 | 0 | 0 | 16.8 | 453.8 | 26.99 | -28.41 |
| 57 | 5 | C | 6.8 | 43.9 | 8.5 | 41 | 1.7 | -2.9 | 3.26 | 14.03 | 4.18 | 18.21 | NA | 17 | 2 | 2 | 16.6 | 459.4 | 27.63 | -28.74 |
| 58 | 5 | C | 7.17 | 42.4 | 9.56 | 54.6 | 2.39 | 12.2 | 4 | 18.53 | 5.63 | 24.16 | 19.54 | 28 | 0 | 0 | 12.8 | 455 | 35.6 | -29.57 |
| 59 | 5 | C | 6.69 | 41.7 | 7.44 | 42.2 | 0.75 | 0.5 | 2.32 | 9.11 | 3.57 | 12.68 | NA | 17 | 4 | 3 | 17 | 466 | 27.47 | -28.51 |
| 60 | 5 | C | 7.21 | 44.7 | 8.64 | 53.2 | 1.43 | 8.5 | 3.61 | 14.78 | 5.3 | 20.08 | 16.16 | 18 | 1 | 2 | 14.5 | 444.2 | 30.58 | -28.97 |
| 61 | 6 | C | 4.7 | 37.7 | 7.08 | 44.3 | 2.38 | 6.6 | 1.54 | 7.88 | 2.46 | 10.34 | NA | 15 | 0 | 0 | 14.9 | 469.4 | 31.52 | -29.15 |
| 62 | 6 | C | 6.41 | 43.2 | 9.1 | 60.5 | 2.69 | 17.3 | NA | NA | NA | NA | NA | 31 | 1 | 2 | 14.2 | 471.6 | 33.18 | -30.36 |
| 63 | 6 | C | 6.94 | 54.2 | 9.52 | 84.8 | 2.58 | 30.6 | 3.19 | 22.58 | 5.27 | 27.85 | NA | 23 | 0 | 0 | 15.4 | 465.9 | 30.16 | -30.27 |
| 64 | 6 | C | 5.65 | 43.2 | 8.27 | 51.5 | 2.62 | 8.3 | 2.51 | 14.85 | 3.86 | 18.71 | 14.98 | 24 | 1 | 1 | NA | NA | NA | NA |
| 65 | 6 | C | 5.48 | 40 | 7.5 | 38.4 | 2.02 | -1.6 | 1.98 | 10.54 | 3.46 | 14 | NA | 25 | 1 | 5 | 17.4 | 465.1 | 26.7 | -29.35 |
| 66 | 6 | C | 4.98 | 46.7 | 6.98 | 53.5 | 2 | 6.8 | 1.36 | 9 | 2.65 | 11.65 | 10.6 | 14 | 0 | 0 | 16.1 | 475.7 | 29.47 | -28.54 |
| 67 | 6 | C | 6.76 | 50 | 9.19 | 63.4 | 2.43 | 13.4 | 2.42 | 17.96 | 4.12 | 22.08 | NA | 26 | 0 | 3 | 15.8 | 462.3 | 29.27 | -30.04 |
| 68 | 6 | C | 6.75 | 44.5 | 8.33 | 46.7 | 1.58 | 2.2 | 1.53 | 12.04 | 3.27 | 15.31 | 14.6 | 17 | 0 | 0 | 16.2 | 462.1 | 28.47 | -29.57 |
| 69 | 6 | C | 7.06 | 55.3 | 8.93 | 58.8 | 1.87 | 3.5 | 3.11 | 18.09 | 4.65 | 22.74 | NA | 27 | 1 | 0 | 15.4 | 475.5 | 30.92 | -29.41 |
| 70 | 6 | C | 5.79 | 38.8 | 8.12 | 43.8 | 2.33 | 5 | 1.59 | 11.34 | 3.13 | 14.47 | NA | 26 | 0 | 5 | 16.8 | 473.8 | 28.13 | -30.3 |
| 71 | 6 | C | 5.14 | 39.7 | 7.4 | 50.4 | 2.26 | 10.7 | 1.15 | 10.27 | 2.83 | 13.1 | NA | 14 | 0 | 0 | 17.6 | 466.2 | 26.45 | -30.79 |
| 72 | 6 | C | 6.54 | 46.9 | 7.82 | 43.2 | 1.28 | -3.7 | 1.16 | 12.75 | 4 | 16.75 | 17.83 | 25 | 0 | 2 | 14.6 | 479.7 | 32.86 | -30.45 |
| 73 | 7 | C | 7.25 | 47.1 | 8.99 | 53.6 | 1.74 | 6.5 | 2.76 | 15.96 | 5.11 | 21.07 | 19.47 | 18 | 2 | 0 | 13.5 | 455.8 | 33.88 | -29.73 |
| 74 | 7 | C | 3 | 27.5 | 4.95 | 31.9 | 1.95 | 4.4 | 0.72 | 3.82 | 1.34 | 5.16 | 6.35 | 7 | 0 | 0 | 20.2 | 459.9 | 22.76 | -30.19 |
| 75 | 7 | C | 6.91 | 55.5 | 9.97 | 61.8 | 3.06 | 6.3 | 3.46 | 21.93 | 5.59 | 27.52 | 25.42 | 28 | 1 | 0 | 15.4 | 465.5 | 30.15 | -28.37 |
| 76 | 7 | C | 6.95 | 45.7 | 8.64 | 43.6 | 1.69 | -2.1 | 2.44 | 14.22 | 3.87 | 18.09 | NA | 22 | 3 | 0 | 19.2 | 462.4 | 24.07 | -27.78 |
| 77 | 7 | C | 7.21 | 50.3 | 9.38 | 48.1 | 2.17 | -2.2 | 3.48 | 18.98 | 5.05 | 24.03 | NA | 24 | 0 | 1 | NA | NA | NA | NA |
| 78 | 7 | C | 5.77 | 42.4 | 7.25 | 49.4 | 1.48 | 7 | 2.05 | 9.42 | 3.15 | 12.57 | NA | 17 | 1 | 0 | 20.7 | 461.3 | 22.29 | -28.2 |
| 79 | 7 | C | 6.42 | 44.3 | 7.61 | 46.7 | 1.19 | 2.4 | 2.54 | 11.14 | 4.13 | 15.27 | NA | 17 | 0 | 0 | 14.6 | 461.3 | 31.67 | -28.59 |
| 80 | 7 | C | 5.4 | 45.4 | 8.45 | 50.5 | 3.05 | 5.1 | 2.27 | 14.21 | 3.98 | 18.19 | NA | 19 | 0 | 0 | 16.5 | 463.6 | 28.18 | -29.17 |
| 81 | 7 | C | 7.56 | 54.8 | 8.98 | 47.9 | 1.42 | -6.9 | 3.35 | 17.16 | 5.36 | 22.52 | 21.56 | 22 | 3 | 13 | NA | NA | NA | NA |
| 82 | 7 | C | 7.02 | 46.8 | 9.2 | 49.3 | 2.18 | 2.5 | 3.07 | 14.95 | 4.94 | 19.89 | NA | 20 | 1 | 0 | 14.4 | 453.2 | 31.48 | -28.41 |
| 83 | 7 | C | 7.32 | 57.2 | 8.83 | 66.5 | 1.51 | 9.3 | 3.24 | 16.48 | 4.38 | 20.86 | NA | 25 | 0 | 0 | 19.9 | 464.8 | 23.38 | -28.9 |
| 84 | 7 | C | 6.6 | 61.1 | 8.67 | 61.4 | 2.07 | 0.3 | 2.86 | 16 | 5.57 | 21.57 | NA | 30 | 0 | 0 | 16.8 | 456.8 | 27.22 | -29.25 |
| 85 | 1 | D | 6.28 | 58.1 | 8.5 | 61.3 | 2.22 | 3.2 | 2.49 | 16.58 | 4.7 | 21.28 | NA | 20 | 1 | 2 | 15.3 | 467.2 | 30.63 | -28.33 |
| 86 | 1 | D | 5.66 | 47.6 | 8.06 | 55.4 | 2.4 | 7.8 | 2.1 | 12.46 | 3.8 | 16.26 | NA | 15 | 2 | 1 | 17.4 | 462.5 | 26.59 | -29.38 |
| 87 | 1 | D | 6.39 | 54 | 7.9 | 51.8 | 1.51 | -2.2 | 1.82 | 12.03 | 3.34 | 15.37 | NA | 15 | 2 | 34 | 14.1 | 458 | 32.51 | -29.13 |
| 88 | 1 | D | 6.9 | 48.8 | 9.36 | 48.3 | 2.46 | -0.5 | 1.52 | 18.27 | 4.48 | 22.75 | NA | 19 | 2 | 0 | 15.7 | 463.1 | 29.45 | -29.19 |
| 89 | 1 | D | 6.8 | 57.8 | 8.84 | 52.6 | 2.04 | -5.2 | 1.61 | 17.43 | 4.62 | 22.05 | 16.7 | 18 | 4 | 1 | 16.1 | 455.8 | 28.23 | -28.38 |
| 90 | 1 | D | 4.55 | 38.5 | 6.44 | 45 | 1.89 | 6.5 | 1.83 | 7.21 | 2.5 | 9.71 | NA | 17 | 1 | 0 | 17.4 | 467.3 | 26.9 | -27.91 |
| 91 | 1 | D | 6.5 | 55.5 | 8.7 | 63.4 | 2.2 | 7.9 | 1.81 | 14.66 | 4.18 | 18.84 | 12.11 | 19 | 0 | 2 | 13.2 | 448.4 | 33.91 | -29.98 |
| 92 | 1 | D | 6.7 | 53.1 | 8.82 | 56.4 | 2.12 | 3.3 | 1.32 | 16.92 | 4.71 | 21.63 | NA | 15 | 2 | 1 | 16.4 | 471.3 | 28.79 | -29.08 |
| 93 | 1 | D | 6.73 | 53.5 | 8.6 | 54.6 | 1.87 | 1.1 | 1.75 | 15.44 | 3.82 | 19.26 | NA | 20 | 3 | 1 | 18.4 | 458.8 | 25 | -28.59 |
| 94 | 1 | D | 5.84 | 37.2 | 8.09 | 37.8 | 2.25 | 0.6 | 1.02 | 8.81 | 2.76 | 11.57 | 11.43 | 12 | 4 | 5 | 17.2 | 456.5 | 26.52 | -28.25 |
| 95 | 1 | D | 5.64 | 53.3 | 7.65 | 53.7 | 2.01 | 0.4 | 2.34 | 14.06 | 4.43 | 18.49 | 14.38 | 19 | 1 | 1 | 13.4 | 468.4 | 34.84 | -29.54 |
| 96 | 1 | D | 5.92 | 59.4 | 7.66 | 53 | 1.74 | -6.4 | 1.36 | 13.12 | 3.51 | 16.63 | NA | 19 | 3 | 3 | 17.7 | 468.2 | 26.41 | -29.49 |
| 97 | 2 | D | 6.94 | 50.2 | 8 | 48.8 | 1.06 | -1.4 | 2.83 | 13.87 | 5.02 | 18.89 | 15.34 | 15 | 3 | 1 | 12.5 | 453.7 | 36.21 | -29.36 |
| 98 | 2 | D | 5.63 | 44.1 | 6.8 | 45.7 | 1.17 | 1.6 | 2.21 | 9.51 | 3.76 | 13.27 | 17.06 | 12 | 0 | 0 | 12.2 | 456.7 | 37.42 | -29.45 |
| 99 | 2 | D | 7.68 | 70.2 | 8.89 | 67 | 1.21 | -3.2 | 3.31 | 18.04 | 5.31 | 23.35 | NA | 22 | 1 | 2 | 11.7 | 464.3 | 39.84 | -29.4 |
| 100 | 2 | D | 5.44 | 41.7 | 6.83 | 42.1 | 1.39 | 0.4 | 1.74 | 9.1 | 3.67 | 12.77 | NA | 9 | 0 | 0 | 11.5 | 460.9 | 40.19 | -30.01 |
| 101 | 2 | D | 6.22 | 47.5 | NA | NA | NA | NA | NA | NA | NA | NA | NA | NA | NA | NA | NA | NA | NA | NA |
| 102 | 2 | D | 5.84 | 40.5 | 7.72 | 49.7 | 1.88 | 9.2 | 2.88 | 13.34 | 4.18 | 17.52 | NA | 24 | 2 | 0 | 13.8 | 468.7 | 33.95 | -28.63 |
| 103 | 2 | D | 5.64 | 48.4 | 6.91 | 53.8 | 1.27 | 5.4 | 0.94 | 10.44 | 1.95 | 12.39 | 10.88 | 16 | 0 | 42 | 12.8 | 460.5 | 36.11 | -30.17 |
| 104 | 2 | D | 5.75 | 43.3 | NA | NA | NA | NA | NA | NA | NA | NA | NA | NA | NA | NA | NA | NA | NA | NA |
| 105 | 2 | D | 4.81 | 34.4 | 6.02 | 37 | 1.21 | 2.6 | 2.01 | 6.6 | 3.05 | 9.65 | 10.49 | 10 | 0 | 20 | 13.2 | 461.2 | 34.84 | -29.97 |
| 106 | 2 | D | 5.21 | 63.5 | 7.3 | 58.7 | 2.09 | -4.8 | 1.93 | 10.46 | 3.92 | 14.38 | NA | 14 | 3 | 0 | 12 | 454.35 | 37.81 | -30.72 |
| 107 | 2 | D | 6.18 | 58.5 | 7.41 | 55 | 1.23 | -3.5 | 1.78 | 11.47 | 3.5 | 14.97 | NA | 18 | 0 | 0 | 13.9 | 469.2 | 33.73 | -28.39 |
| 108 | 2 | D | 5.47 | 51.3 | 6.22 | 56.3 | 0.75 | 5 | 2.61 | 8.46 | 3.56 | 12.02 | NA | 12 | 0 | 0 | 11.7 | 465.9 | 39.67 | -29.4 |
| 109 | 3 | D | 6.28 | 44.9 | 8.03 | 54.1 | 1.75 | 9.2 | 4.38 | 15.3 | 5.72 | 21.02 | 21.74 | 30 | 0 | 4 | 12 | 459.1 | 38.29 | -29.02 |
| 110 | 3 | D | 6 | 32 | 7.73 | 36.8 | 1.73 | 4.8 | 4.08 | 11.36 | 4.61 | 15.97 | 14.04 | 24 | 0 | 2 | 12.6 | 463.5 | 36.91 | -29.41 |
| 111 | 3 | D | 6.64 | 51 | 9.15 | 60.4 | 2.51 | 9.4 | 3.79 | 19.29 | 5.69 | 24.98 | NA | 19 | 0 | 0 | 12.3 | 476 | 38.76 | -29.77 |
| 112 | 3 | D | 6.54 | 54.2 | 7.94 | 57.7 | 1.4 | 3.5 | 3.1 | 14.27 | 5.65 | 19.92 | 21.24 | 17 | 0 | 4 | 10.8 | 450.1 | 41.6 | -29.53 |
| 113 | 3 | D | 6.25 | 27.5 | 8.97 | 38.6 | 2.72 | 11.1 | 3.67 | 12.03 | 4.96 | 16.99 | NA | 16 | 0 | 0 | 12.3 | 454.2 | 37.01 | -29.62 |
| 114 | 3 | D | 7.44 | 47.7 | 9.31 | 60.4 | 1.87 | 12.7 | 4.75 | 19.78 | 6.27 | 26.05 | NA | 21 | 1 | 1 | 12.6 | 465.8 | 36.91 | -30.61 |
| 115 | 3 | D | 5.3 | 29 | 7.07 | 35.4 | 1.77 | 6.4 | 2.31 | 7.5 | 2.89 | 10.39 | NA | 13 | 0 | 1 | 15.2 | 466 | 30.76 | -28.94 |
| 116 | 3 | D | 6.66 | 37 | 8.63 | 44.2 | 1.97 | 7.2 | 4.09 | 15.19 | 5.56 | 20.75 | NA | 20 | 1 | 0 | 13.7 | 457.4 | 33.49 | -30.2 |
| 117 | 3 | D | 8.35 | 56.9 | 10.56 | 61.5 | 2.21 | 4.6 | 3.72 | 27.22 | 6.75 | 33.97 | NA | 26 | 0 | 4 | 13.4 | 465 | 34.8 | -29.84 |
| 118 | 3 | D | 6.75 | 52.8 | 8.37 | 54.1 | 1.62 | 1.3 | 4.5 | 17.44 | 6.35 | 23.79 | NA | 18 | 0 | 0 | 13.6 | 461.9 | 33.88 | -30.15 |
| 119 | 3 | D | 7.34 | 38.5 | 9.41 | 44.3 | 2.07 | 5.8 | 4.87 | 16.93 | 6.96 | 23.89 | 21.65 | 30 | 0 | 1 | 12 | 447.95 | 37.39 | -30.13 |
| 120 | 3 | D | 5.91 | 37.1 | 7.12 | 37.2 | 1.21 | 0.1 | 3.15 | 10.44 | 4.32 | 14.76 | NA | 13 | 0 | 0 | 13 | 479.4 | 37.01 | -29.36 |
| 121 | 4 | D | 5.65 | 39.6 | 8.4 | 49.6 | 2.75 | 10 | 2.51 | 15.07 | 4.43 | 19.5 | NA | 26 | 1 | 0 | 15.6 | 458.4 | 29.3 | -29.04 |
| 122 | 4 | D | 5.59 | 56.4 | 8.7 | 58 | 3.11 | 1.6 | 3.43 | 16.47 | 5.96 | 22.43 | 15.17 | 19 | 3 | 0 | 12.4 | 442.1 | 35.64 | -28.18 |
| 123 | 4 | D | 7.06 | 51.4 | 8.28 | 52.9 | 1.22 | 1.5 | 3.54 | 17.86 | 5.42 | 23.28 | 18.82 | 27 | 0 | 0 | 12.5 | 466.3 | 37.2 | -28.26 |
| 124 | 4 | D | 7.16 | 53.5 | 8.48 | 57.9 | 1.32 | 4.4 | 2.52 | 14.23 | 4.39 | 18.62 | 10.8 | 30 | 2 | 56 | 15.1 | 461.5 | 30.48 | -28.45 |
| 125 | 4 | D | 6.73 | 58.4 | 8.35 | 59.7 | 1.62 | 1.3 | 2.86 | 15.73 | 5.43 | 21.16 | 17.35 | 24 | 1 | 0 | 13.5 | 469.1 | 34.82 | -28.7 |
| 126 | 4 | D | 6.69 | 42.3 | 9.14 | 47 | 2.45 | 4.7 | 2.87 | 16.56 | 4.62 | 21.18 | NA | 27 | 0 | 0 | 14.5 | 459.3 | 31.7 | -28.63 |
| 127 | 4 | D | 6.74 | 65.2 | 9.7 | 63.2 | 2.96 | -2 | 3.53 | 19.82 | 5.42 | 25.24 | NA | 17 | 2 | 0 | 13.15 | 457.7 | 34.77 | -28.2 |
| 128 | 4 | D | 6.9 | 72.4 | 8.69 | 70.4 | 1.79 | -2 | 2.01 | 18.88 | 5.27 | 24.15 | NA | 27 | 3 | 1 | 12.8 | 470.2 | 36.77 | -29.48 |
| 129 | 4 | D | 6.48 | 59.4 | 8.52 | 62.4 | 2.04 | 3 | 3.54 | 17.85 | 5.68 | 23.53 | NA | 25 | 0 | 0 | 14.9 | 474.6 | 31.82 | -28.58 |
| 130 | 4 | D | 6.46 | 46.9 | 8.16 | 45 | 1.7 | -1.9 | 2.32 | 13.16 | 4.32 | 17.48 | NA | 14 | 1 | 0 | 13.7 | 459.2 | 33.45 | -29.08 |
| 131 | 4 | D | 6.2 | 73.9 | 8.62 | 69.7 | 2.42 | -4.2 | 3.29 | 15.14 | 5.1 | 20.24 | NA | 22 | 1 | 0 | 12.1 | 446.9 | 37.01 | -29.03 |
| 132 | 4 | D | 7.03 | 49.7 | 8.48 | 56.7 | 1.45 | 7 | 3.93 | 19.96 | 5.84 | 25.8 | NA | 23 | 1 | 0 | 11.9 | 468.8 | 39.4 | -28.82 |
| 133 | 5 | D | 7.26 | 46.9 | 9.42 | 59.3 | 2.16 | 12.4 | 2.83 | 16.55 | 4.15 | 20.7 | NA | 27 | 0 | 0 | 16.5 | 454.2 | 27.55 | -28.7 |
| 134 | 5 | D | 6.29 | 41.8 | 7.37 | 43.9 | 1.08 | 2.1 | 2.62 | 11.74 | 4.17 | 15.91 | NA | 23 | 0 | 3 | 13.8 | 460.65 | 33.36 | -28.88 |
| 135 | 5 | D | 6.1 | 37 | 7.94 | 46.6 | 1.84 | 9.6 | 3.24 | 13.16 | 3.97 | 17.13 | NA | 17 | 1 | 3 | 15.8 | 462 | 29.25 | -28.95 |
| 136 | 5 | D | 6.68 | 45.2 | 7.87 | 47.2 | 1.19 | 2 | 2.81 | 14.36 | 4.75 | 19.11 | NA | 26 | 2 | 2 | 12.5 | 448.1 | 35.77 | -28.11 |
| 137 | 5 | D | 6.69 | 36.6 | 7.76 | 42 | 1.07 | 5.4 | 2.82 | 11.52 | 3.99 | 15.51 | NA | 24 | 0 | 1 | 15.2 | 447.1 | 29.49 | -29.67 |
| 138 | 5 | D | 7.25 | 47.8 | 9.69 | 52.1 | 2.44 | 4.3 | 2.56 | 16.92 | 5.49 | 22.41 | 21.95 | 25 | 0 | 0 | 12.8 | 448 | 34.92 | -28.66 |
| 139 | 5 | D | 6.71 | 44.2 | 9.06 | 51.5 | 2.35 | 7.3 | 2.84 | 15.97 | 5.23 | 21.2 | NA | 24 | 1 | 1 | 15.7 | 437.9 | 27.87 | -28.46 |
| 140 | 5 | D | 6.16 | 41.8 | 7.17 | 39.4 | 1.01 | -2.4 | 2.35 | 9.62 | 3.36 | 12.98 | 11.06 | 27 | 6 | 18 | 17.2 | 452.5 | 26.34 | -28.86 |
| 141 | 5 | D | 6.72 | 41.8 | 8.3 | 48.9 | 1.58 | 7.1 | NA | NA | NA | NA | NA | 28 | 0 | 1 | 13.4 | 452.8 | 33.92 | -27.78 |
| 142 | 5 | D | 6.1 | 41 | 8.52 | 45.3 | 2.42 | 4.3 | 3.44 | 12.86 | 5.32 | 18.18 | 15.73 | 18 | 0 | 1 | 12.5 | 447.5 | 35.68 | -28.81 |
| 143 | 5 | D | 7.06 | 55 | 8.96 | 52 | 1.9 | -3 | 2.65 | 16.89 | 4.81 | 21.7 | NA | 28 | 4 | 4 | 13.6 | 462.9 | 34.14 | -28.78 |
| 144 | 5 | D | 5.93 | 43.3 | 7.49 | 47.9 | 1.56 | 4.6 | 3.06 | 12.3 | 4.39 | 16.69 | 13.09 | 18 | 1 | 2 | 13.65 | 457.65 | 33.58 | -29 |
| 145 | 6 | D | 5.77 | 43.7 | 7.85 | 46.6 | 2.08 | 2.9 | 1.79 | 12.49 | 3.24 | 15.73 | NA | 20 | 1 | 0 | 12.9 | 460.4 | 35.67 | -29.93 |
| 146 | 6 | D | 6.01 | 64.1 | 7.93 | 71.6 | 1.92 | 7.5 | 2.98 | 18.35 | 4.34 | 22.69 | NA | 27 | 0 | 0 | 12.8 | 473.4 | 37.12 | -30.39 |
| 147 | 6 | D | 6.55 | 54.4 | NA | NA | NA | NA | NA | NA | NA | NA | 16.69 | NA | NA | NA | NA | NA | NA | NA |
| 148 | 6 | D | 6.5 | 46.7 | 9.27 | 46.3 | 2.77 | -0.4 | 2.85 | 18.92 | 4.85 | 23.77 | NA | 38 | 1 | 2 | 14.7 | 461.2 | 31.32 | -29.68 |
| 149 | 6 | D | 4.76 | 46.8 | 6.75 | 47.9 | 1.99 | 1.1 | 1.43 | 8.92 | 2.1 | 11.02 | 10.44 | 17 | 0 | 0 | 16.9 | 478.5 | 28.36 | -29.53 |
| 150 | 6 | D | 6.4 | 41.3 | 8.09 | 39.7 | 1.69 | -1.6 | 1.97 | 12.07 | 3.65 | 15.72 | NA | 26 | 1 | 0 | 15.8 | 459.2 | 28.97 | -30.5 |
| 151 | 6 | D | 6.59 | 38.4 | 9.15 | 46.3 | 2.56 | 7.9 | 2.2 | 15.83 | 4.61 | 20.44 | 15.41 | 23 | 1 | 1 | 14.9 | 461.2 | 31.01 | -30.52 |
| 152 | 6 | D | 5.5 | 50.6 | 7.18 | 54.9 | 1.68 | 4.3 | 2.15 | 10.68 | 3.69 | 14.37 | 14.46 | 19 | 0 | 0 | 11.2 | 455.4 | 40.57 | -29.91 |
| 153 | 6 | D | 7 | 50.9 | 8.32 | 47.5 | 1.32 | -3.4 | 3.12 | 18.84 | 4.94 | 23.78 | NA | 21 | 1 | 0 | 12.9 | 457.4 | 35.56 | -29.89 |
| 154 | 6 | D | 6.26 | 38 | 7.95 | 39.8 | 1.69 | 1.8 | 3.23 | 13.49 | 5.17 | 18.66 | NA | 23 | 0 | 0 | 12.4 | 460.4 | 37 | -30.15 |
| 155 | 6 | D | 4.5 | 35.2 | 7.23 | 37.2 | 2.73 | 2 | 1.9 | 8.52 | 2.53 | 11.05 | NA | 12 | 0 | 0 | 12 | 456.3 | 38.15 | -31.32 |
| 156 | 6 | D | 6.02 | 45.4 | 7.97 | 54.4 | 1.95 | 9 | 2.2 | 11.2 | 3.1 | 14.3 | NA | 18 | 1 | 0 | 13.85 | 459.85 | 33.2 | -29.73 |
| 157 | 7 | D | 5.27 | 30 | 7.78 | 38.5 | 2.51 | 8.5 | 2.54 | 9.71 | 3.91 | 13.62 | NA | 29 | 0 | 0 | 17.2 | 455.2 | 26.45 | -29.18 |
| 158 | 7 | D | 6.57 | 51.4 | 8.45 | 57.8 | 1.88 | 6.4 | 2.34 | 15.05 | 4.36 | 19.41 | NA | 18 | 2 | 0 | 14.7 | 451.1 | 30.64 | -28.6 |
| 159 | 7 | D | 6.31 | 46.4 | 8.88 | 66.7 | 2.57 | 20.3 | 2.32 | 17.26 | 5.49 | 22.75 | NA | 15 | 0 | 0 | 14.9 | 445.1 | 29.81 | -28.89 |
| 160 | 7 | D | 5.7 | 44.3 | 7.26 | 54.2 | 1.56 | 9.9 | 2.81 | 11.2 | 4.4 | 15.6 | NA | 26 | 0 | 2 | 14.85 | 460.95 | 30.99 | -28.66 |
| 161 | 7 | D | 6.42 | 45.2 | 7.85 | 51.5 | 1.43 | 6.3 | 2.89 | 11.83 | 4.52 | 16.35 | 16.78 | 18 | 1 | 0 | NA | NA | NA | NA |
| 162 | 7 | D | 7.48 | 49 | 9.62 | 53.2 | 2.14 | 4.2 | 3.17 | 19.43 | 4.68 | 24.11 | 22.31 | 16 | 2 | 0 | 16.3 | 452.7 | 27.81 | -28.26 |
| 163 | 7 | D | 6.58 | 41.5 | 8.26 | 53.1 | 1.68 | 11.6 | 3.86 | 14.94 | 5.49 | 20.43 | NA | 26 | 1 | 3 | 13.8 | 449.6 | 32.57 | -30.15 |
| 164 | 7 | D | 5.76 | 31.4 | 7.82 | 31.4 | 2.06 | 0 | 2.59 | 10.3 | 3.91 | 14.21 | NA | 21 | 1 | 0 | 16.2 | 461.2 | 28.47 | -29.33 |
| 165 | 7 | D | 5.46 | 37.1 | 7.97 | 45.3 | 2.51 | 8.2 | 2.34 | 13.58 | 4.06 | 17.64 | NA | 17 | 0 | 0 | 17.3 | 459.6 | 26.57 | -28.87 |
| 166 | 7 | D | 6.47 | 41.7 | 8.69 | 35.8 | 2.22 | -5.9 | 1.3 | 12.57 | 3.03 | 15.6 | 11.41 | 20 | 1 | 2 | NA | NA | NA | NA |
| 167 | 7 | D | 7.4 | 48.7 | 9.35 | 56.5 | 1.95 | 7.8 | 2.97 | 18.35 | 4.44 | 22.79 | 17.49 | 20 | 2 | 3 | 15.35 | 451.25 | 29.39 | -28.58 |
| 168 | 7 | D | 6.91 | 44.6 | 9.63 | 66.3 | 2.72 | 21.7 | 3.06 | 21.47 | 6.17 | 27.64 | NA | 18 | 0 | 0 | 15.2 | 456.4 | 29.98 | -29.44 |
| 169 | 1 | N | 5.82 | 51.5 | 8.36 | 58 | 2.54 | 6.5 | 2.72 | 15.17 | 4.93 | 20.1 | 16.96 | 21 | 4 | 0 | 18.9 | 450.5 | 23.9 | -29.15 |
| 170 | 1 | N | 6.18 | 45 | 9.03 | 45.4 | 2.85 | 0.4 | 2.44 | 15.81 | 4.5 | 20.31 | NA | 19 | 5 | 3 | 20.4 | 468.8 | 22.96 | -28.41 |
| 171 | 1 | N | 5.1 | 47.6 | 7.4 | 53.8 | 2.3 | 6.2 | 1.75 | 12.88 | 3.16 | 16.04 | NA | 15 | 3 | 0 | 21.1 | 461.1 | 21.84 | -28.88 |
| 172 | 1 | N | 5.25 | 41.5 | 7.38 | 37.4 | 2.13 | -4.1 | 2.17 | 11.18 | 3.12 | 14.3 | NA | 16 | 2 | 0 | 22 | 458.3 | 20.8 | -28.93 |
| 173 | 1 | N | 5.51 | 41.4 | 7.93 | 48.8 | 2.42 | 7.4 | 2.03 | 12.85 | 3.96 | 16.81 | NA | 17 | 3 | 1 | 20.7 | 457.3 | 22.09 | -29.39 |
| 174 | 1 | N | 6.35 | 40.5 | 9.01 | 42.4 | 2.66 | 1.9 | 0.94 | 13.99 | 4.34 | 18.33 | 12 | 19 | 3 | 9 | 20.8 | 443 | 21.28 | -29.2 |
| 175 | 1 | N | 5.95 | 45.1 | 8.89 | 43.6 | 2.94 | -1.5 | 2.09 | 14.14 | 3.95 | 18.09 | NA | 22 | 6 | 8 | 21.2 | 448.7 | 21.15 | -28.97 |
| 176 | 1 | N | 6.45 | 63.5 | 9.34 | 57.8 | 2.89 | -5.7 | 2.22 | 18.32 | 4.92 | 23.24 | 14.95 | 24 | 11 | 6 | 19.9 | 459.8 | 23.16 | -28.29 |
| 177 | 1 | N | 4.44 | 29.5 | 7.22 | 31.6 | 2.78 | 2.1 | 2.33 | 7.96 | 3.12 | 11.08 | NA | 21 | 2 | 1 | 18.4 | 451.5 | 24.48 | -28.78 |
| 178 | 1 | N | 4.98 | 35.5 | 7.86 | 43.1 | 2.88 | 7.6 | 1.89 | 9.6 | 2.95 | 12.55 | 10.34 | 13 | 1 | 1 | 19.5 | 449.4 | 23.02 | -28.47 |
| 179 | 1 | N | 6.77 | 56.5 | 9.48 | 56.4 | 2.71 | -0.1 | 2.92 | 20.78 | 5.6 | 26.38 | NA | 18 | 1 | 3 | 17.7 | 470.8 | 26.65 | -28.77 |
| 180 | 1 | N | 6.56 | 52.1 | 10.18 | 47.7 | 3.62 | -4.4 | 2.04 | 19.13 | 4.52 | 23.65 | NA | 14 | 2 | 1 | 20.7 | 469 | 22.65 | -29.49 |
| 181 | 2 | N | 5 | 35.4 | 6.93 | 37.2 | 1.93 | 1.8 | 2.13 | 7.44 | 2.99 | 10.43 | NA | 18 | 2 | 0 | 15.5 | 462.2 | 29.87 | -28.69 |
| 182 | 2 | N | 7.28 | 48.9 | 9.07 | 62.6 | 1.79 | 13.7 | 4.02 | 18.14 | 6.11 | 24.25 | 17.18 | 27 | 0 | 1 | 14.4 | 462.9 | 32.13 | -30.94 |
| 183 | 2 | N | 7.64 | 57 | 8.49 | 54.3 | 0.85 | -2.7 | 3 | 16.72 | 4.69 | 21.41 | 13.9 | NA | 0 | 5 | 25.8 | 477 | 18.5 | -28.46 |
| 184 | 2 | N | 6.4 | 47 | 8.65 | 57.3 | 2.25 | 10.3 | 4.23 | 16.33 | 5.78 | 22.11 | NA | 23 | 1 | 0 | 17.7 | 459.2 | 25.91 | -29.45 |
| 185 | 2 | N | 5.25 | 33.1 | 7.82 | 42 | 2.57 | 8.9 | 2.41 | 12.49 | 4.28 | 16.77 | NA | 17 | 2 | 0 | 13.3 | 463.6 | 34.93 | -29.5 |
| 186 | 2 | N | 6.38 | 46.7 | 8.64 | 48 | 2.26 | 1.3 | 2.67 | 15.93 | 5.39 | 21.32 | NA | 26 | 0 | 0 | 14.9 | 463 | 31.08 | -28.61 |
| 187 | 2 | N | 7.11 | 62.4 | 9.63 | 74.4 | 2.52 | 12 | 3.25 | 21.75 | 5.49 | 27.24 | NA | 22 | 3 | 2 | 16.1 | 452.5 | 28.15 | -28.61 |
| 188 | 2 | N | 5.55 | 42.1 | 8.46 | 46 | 2.91 | 3.9 | 2.43 | 12.1 | 4.25 | 16.35 | NA | 16 | 2 | 1 | 19 | 461.1 | 24.22 | -29.65 |
| 189 | 2 | N | 7.41 | 57 | 9.46 | 59.3 | 2.05 | 2.3 | 3.29 | 20.45 | 5.67 | 26.12 | 16.6 | 29 | 1 | 0 | 16.7 | 459.2 | 27.52 | -28.54 |
| 190 | 2 | N | 6.3 | 49.3 | 8.18 | 51.3 | 1.88 | 2 | 2.54 | 14.82 | 4.64 | 19.46 | NA | 19 | 6 | 5 | 17.6 | 467 | 26.58 | -28.72 |
| 191 | 2 | N | 7.16 | 45.9 | 8.98 | 50 | 1.82 | 4.1 | 4.09 | 16.66 | 6.64 | 23.3 | NA | 27 | 1 | 0 | NA | NA | NA | NA |
| 192 | 2 | N | 7.09 | 41.3 | 8.33 | 48.2 | 1.24 | 6.9 | 3.07 | 15.04 | 4.79 | 19.83 | 14.4 | 23 | 1 | 1 | 19.35 | 467.6 | 24.18 | -29.43 |
| 193 | 3 | N | 6.46 | 45.5 | 8.99 | 59.5 | 2.53 | 14 | 4.35 | 21.93 | 7.2 | 29.13 | NA | 32 | 0 | 3 | 13.3 | 468.2 | 35.21 | -29.78 |
| 194 | 3 | N | 6.6 | 52.3 | 8.94 | 61 | 2.34 | 8.7 | 4.33 | 19.27 | 5.88 | 25.15 | NA | 20 | 0 | 1 | 13.4 | 465.1 | 34.81 | -28.78 |
| 195 | 3 | N | 7.4 | 57.4 | 10.79 | 70.4 | 3.39 | 13 | 4.72 | 31.8 | 7.74 | 39.54 | 27.49 | 24 | 0 | 0 | 16.1 | 470.5 | 29.21 | -29.86 |
| 196 | 3 | N | 6.09 | 43.4 | 8.63 | 43.7 | 2.54 | 0.3 | 4.18 | 20.34 | 5.85 | 26.19 | NA | 33 | 0 | 2 | 17.65 | 469.4 | 26.55 | -29.46 |
| 197 | 3 | N | 7.36 | 55.4 | 10.3 | 79.2 | 2.94 | 23.8 | 5.92 | 26.24 | 7.84 | 34.08 | NA | 27 | 0 | 1 | 14.6 | 471.4 | 32.23 | -30.47 |
| 198 | 3 | N | 5.36 | 28.1 | 8.01 | 38.4 | 2.65 | 10.3 | 1.87 | 9.76 | 4.59 | 14.35 | NA | 10 | 0 | 0 | 17.7 | 465.7 | 26.29 | -30 |
| 199 | 3 | N | 7.1 | 48.8 | 9.58 | 54.3 | 2.48 | 5.5 | 4.87 | 20.47 | 7.95 | 28.42 | 19.79 | 21 | 1 | 1 | 12.9 | 453.2 | 35.08 | -29.79 |
| 200 | 3 | N | 5.54 | 37 | 7.86 | 47 | 2.32 | 10 | 2.77 | 10.48 | 4.4 | 14.88 | NA | 11 | 0 | 0 | 19.8 | 454.2 | 22.92 | -29.68 |
| 201 | 3 | N | 4.79 | 47.2 | 10.2 | 56.4 | 5.41 | 9.2 | 4.25 | 23.16 | 6.19 | 29.35 | 19.73 | 28 | 3 | 4 | 18.85 | 460.2 | 24.44 | -29.85 |
| 202 | 3 | N | 6.56 | 26.9 | 6.62 | 42.7 | 0.06 | 15.8 | 2.96 | 8.38 | 3.61 | 11.99 | NA | 10 | 0 | 0 | 14.9 | 464.9 | 31.2 | -28.91 |
| 203 | 3 | N | 6.95 | 48.2 | 9.5 | 57.4 | 2.55 | 9.2 | 4.71 | 17.77 | 5.92 | 23.69 | NA | 15 | 2 | 1 | 16.9 | 450 | 26.56 | -29.46 |
| 204 | 3 | N | 5.48 | 36.2 | 7.57 | 34.8 | 2.09 | -1.4 | 3.01 | 10.01 | 4.27 | 14.28 | 13.35 | 19 | 1 | 0 | 18.4 | 467.1 | 25.45 | -29.89 |
| 205 | 4 | N | 7.38 | 48.4 | 9.95 | 69.1 | 2.57 | 20.7 | 3.06 | 20.07 | 4.43 | 24.5 | NA | 27 | 0 | 0 | 17 | 460 | 27.02 | -29.13 |
| 206 | 4 | N | 5.93 | 45.3 | 8.28 | 54.7 | 2.35 | 9.4 | 3.38 | 16.19 | 4.94 | 21.13 | NA | 25 | 0 | 3 | 15.4 | 455.5 | 29.59 | -28.78 |
| 207 | 4 | N | 5.52 | 47.3 | 8.49 | 53.6 | 2.97 | 6.3 | 3.96 | 15.47 | 5.69 | 21.16 | NA | 21 | 1 | 0 | 14.4 | 459.6 | 31.95 | -29.06 |
| 208 | 4 | N | 7.04 | 54 | 10.2 | 57.5 | 3.16 | 3.5 | 2.86 | 22.3 | 5.21 | 27.51 | NA | 27 | 1 | 0 | 19.2 | 462.1 | 24.04 | -28.59 |
| 209 | 4 | N | 4.21 | 43.2 | 6 | 38.4 | 1.79 | -4.8 | -0.27 | 6.23 | 1.6 | 7.83 | NA | 11 | 4 | 0 | 24.6 | 470.7 | 19.16 | -28.97 |
| 210 | 4 | N | 7.24 | 54 | 10.5 | 70.1 | 3.26 | 16.1 | 4.5 | 27.24 | 6.03 | 33.27 | NA | 27 | 0 | 0 | 15.8 | 456.8 | 28.92 | -28.42 |
| 211 | 4 | N | 5.9 | 33.2 | 7.63 | 36.8 | 1.73 | 3.6 | 2.23 | 10.59 | 3.24 | 13.83 | 10.38 | 21 | 0 | 0 | 23.3 | 474 | 20.37 | -28.5 |
| 212 | 4 | N | 6.12 | 45.5 | 9.93 | 51 | 3.81 | 5.5 | 2.55 | 16.75 | 4.32 | 21.07 | 13.6 | 25 | 0 | 0 | 16.3 | 441.5 | 27.02 | -29.17 |
| 213 | 4 | N | 7.45 | 61.4 | 10.89 | 60.7 | 3.44 | -0.7 | 3.03 | 23.49 | 5.16 | 28.65 | 20.91 | 32 | 5 | 1 | 19.6 | 457.3 | 23.33 | -28.23 |
| 214 | 4 | N | 6.36 | 59.4 | 7.97 | 65.1 | 1.61 | 5.7 | 2.17 | 15.62 | 2.89 | 18.51 | 12.01 | 19 | 0 | 0 | 24.7 | 480 | 19.46 | -27.88 |
| 215 | 4 | N | 5.6 | 48.7 | 8.03 | 54.4 | 2.43 | 5.7 | 2.28 | 13.63 | 3.27 | 16.9 | NA | 25 | 0 | 1 | 23.7 | 476.7 | 20.14 | -28.2 |
| 216 | 4 | N | 5.52 | 60.2 | NA | NA | NA | NA | NA | NA | NA | NA | NA | NA | NA | NA | NA | NA | NA | NA |
| 217 | 5 | N | 7.13 | 48.7 | 9.72 | 48.3 | 2.59 | -0.4 | 3.62 | 15.35 | 5.52 | 20.87 | 18.23 | 19 | 0 | 0 | 17.5 | 454.7 | 25.93 | -29.49 |
| 218 | 5 | N | 7.22 | 44 | 9.51 | 56.6 | 2.29 | 12.6 | 3.38 | 19.1 | 5.28 | 24.38 | NA | 22 | 0 | 0 | 19.1 | 446.4 | 23.38 | -28.92 |
| 219 | 5 | N | 6.55 | 48.9 | 8.33 | 49.6 | 1.78 | 0.7 | 3.54 | 12.46 | 4.52 | 16.98 | NA | 17 | 1 | 1 | 18.6 | 464.3 | 24.98 | -27.81 |
| 220 | 5 | N | 6.35 | 46.1 | 8.65 | 62.8 | 2.3 | 16.7 | 3.3 | 17.28 | 5.29 | 22.57 | NA | 19 | 0 | 0 | 18.7 | 449.5 | 24 | -28.38 |
| 221 | 5 | N | 6.57 | 39.9 | 9.53 | 44.2 | 2.96 | 4.3 | 2.67 | 15.16 | 4.49 | 19.65 | 12.43 | 20 | 1 | 1 | 18.7 | 445 | 23.77 | -29.21 |
| 222 | 5 | N | 6.47 | 39 | 8.83 | 43 | 2.36 | 4 | 2.23 | 10.67 | 3.09 | 13.76 | NA | 23 | 0 | 0 | 22.2 | 463.2 | 20.85 | -28.16 |
| 223 | 5 | N | 6.07 | 39.9 | 8.59 | 43.5 | 2.52 | 3.6 | 2.91 | 12.42 | 4.25 | 16.67 | NA | 21 | 0 | 2 | 19.35 | 457.6 | 23.65 | -28.87 |
| 224 | 5 | N | 7.21 | 48.4 | 9.9 | 47 | 2.69 | -1.4 | 4.1 | 19.16 | 6.01 | 25.17 | 19.98 | 32 | 4 | 1 | 17.1 | 460.8 | 26.88 | -28.68 |
| 225 | 5 | N | 6.58 | 54 | 10.45 | 66.5 | 3.87 | 12.5 | 4.32 | 23.13 | 6.08 | 29.21 | NA | 22 | 1 | 0 | 17.9 | 461.3 | 25.72 | -28.9 |
| 226 | 5 | N | 5.18 | 33.3 | 6.7 | 37.1 | 1.52 | 3.8 | 1.98 | 8.55 | 3.06 | 11.61 | NA | 13 | 0 | 0 | 20.8 | 471.6 | 22.63 | -28.17 |
| 227 | 5 | N | 7.75 | 38.4 | 9.92 | 47.8 | 2.17 | 9.4 | 3.64 | 18.54 | 5.78 | 24.32 | NA | 27 | 1 | 0 | 19.3 | 460.7 | 23.85 | -29.39 |
| 228 | 5 | N | 5.28 | 37.2 | 6.49 | 41.3 | 1.21 | 4.1 | 2.11 | 8.28 | 2.94 | 11.22 | 9.47 | 18 | 1 | 0 | 17.55 | 462.1 | 26.31 | -29.22 |
| 229 | 6 | N | 6.28 | 47.4 | 9.13 | 59.9 | 2.85 | 12.5 | 2.57 | 19.21 | 4.52 | 23.73 | NA | 23 | 1 | 0 | 20.4 | 467.4 | 22.97 | -29.94 |
| 230 | 6 | N | 5.97 | 57 | 8.31 | 62 | 2.34 | 5 | 2.22 | 15.2 | 4.05 | 19.25 | 15.37 | 20 | 0 | 0 | 19.5 | 457.3 | 23.46 | -29.23 |
| 231 | 6 | N | 6.12 | 43.2 | 8.65 | 50.2 | 2.53 | 7 | 2.63 | 15.3 | 3.61 | 18.91 | NA | 19 | 0 | 0 | 20.6 | 456.1 | 22.13 | -29.96 |
| 232 | 6 | N | 5.04 | 32.7 | 8.36 | 38.7 | 3.32 | 6 | 2.17 | 11.71 | 3.21 | 14.92 | NA | 25 | 0 | 0 | 18.4 | 467.85 | 25.48 | -29.74 |
| 233 | 6 | N | 6.29 | 41.4 | 8.65 | 56.1 | 2.36 | 14.7 | 2.06 | 15.43 | 3.77 | 19.2 | 11.15 | 31 | 0 | 3 | 21 | 448.8 | 21.42 | -29.42 |
| 234 | 6 | N | 4.85 | 37.6 | 7.02 | 39.1 | 2.17 | 1.5 | 1.41 | 9.08 | 2.9 | 11.98 | NA | 15 | 1 | 0 | 21.7 | 472.9 | 21.77 | -30.71 |
| 235 | 6 | N | 5.66 | 38.3 | NA | NA | NA | NA | NA | NA | NA | NA | NA | NA | NA | NA | NA | NA | NA | NA |
| 236 | 6 | N | 6.15 | 43 | 8.83 | 58.2 | 2.68 | 15.2 | 2.54 | 16.07 | 3.81 | 19.88 | NA | 21 | 0 | 0 | 16.1 | 461.3 | 28.68 | -29.61 |
| 237 | 6 | N | 8.11 | 57.5 | 9.52 | 61 | 1.41 | 3.5 | 3.87 | 22.56 | 5.99 | 28.55 | NA | 33 | 1 | 1 | 15 | 467.6 | 31.17 | -30.52 |
| 238 | 6 | N | 6.6 | 47.3 | 9.34 | 57.7 | 2.74 | 10.4 | 2.78 | 20.95 | 4.54 | 25.49 | 15.71 | 34 | 2 | 0 | 19 | 457.9 | 24.1 | -30.27 |
| 239 | 6 | N | 6.13 | 48.1 | 8.2 | 50 | 2.07 | 1.9 | 2.01 | 13.29 | 3.31 | 16.6 | NA | 18 | 1 | 0 | 21 | 458.3 | 21.78 | -29.99 |
| 240 | 6 | N | 5.92 | 45.4 | 9.18 | 60.4 | 3.26 | 15 | 3 | 18.45 | 4.21 | 22.66 | 15.83 | 24 | 3 | 0 | 18.6 | 458 | 24.63 | -30.96 |
| 241 | 7 | N | 7.45 | 50 | 9.58 | 58.6 | 2.13 | 8.6 | 2.36 | 17.59 | 4.98 | 22.57 | 17.13 | 31 | 2 | 1 | 20.5 | 465.1 | 22.69 | -28.97 |
| 242 | 7 | N | 6.5 | 51.1 | NA | NA | NA | NA | NA | NA | NA | NA | NA | NA | NA | NA | NA | NA | NA | NA |
| 243 | 7 | N | 7.99 | 49.5 | 10.55 | 55 | 2.56 | 5.5 | 3.91 | 17.58 | 6.54 | 24.12 | NA | 38 | 0 | 1 | 16.7 | 449.6 | 26.86 | -28.7 |
| 244 | 7 | N | 6.62 | 45.6 | 8.62 | 52.6 | 2 | 7 | 3.09 | 14.88 | 4.95 | 19.83 | NA | 19 | 1 | 0 | 19.2 | 458.3 | 23.91 | -29.1 |
| 245 | 7 | N | 7.92 | 57 | 10.29 | 70.4 | 2.37 | 13.4 | 4.78 | 22.71 | 7.87 | 30.58 | NA | 19 | 0 | 0 | 16.5 | 459.8 | 27.88 | -29.22 |
| 246 | 7 | N | 6.24 | 36 | 8.83 | 36.6 | 2.59 | 0.6 | 2.98 | 13.61 | 4.23 | 17.84 | NA | 43 | 3 | 0 | 20.8 | 457.1 | 21.98 | -28.99 |
| 247 | 7 | N | 8.23 | 55.7 | 10.78 | 56.7 | 2.55 | 1 | 4.01 | 24.12 | 6.77 | 30.89 | NA | 28 | 0 | 2 | NA | NA | NA | NA |
| 248 | 7 | N | 5.86 | 47.5 | 6.67 | 39.9 | 0.81 | -7.6 | 1.44 | 7.96 | 2.47 | 10.43 | NA | 15 | 2 | 1 | 24.2 | 463 | 19.13 | -28.37 |
| 249 | 7 | N | 8.31 | 47.5 | 11.05 | 53.9 | 2.74 | 6.4 | 5.19 | 21.84 | 7.01 | 28.85 | 33.01 | 28 | 1 | 1 | 17.5 | 462.6 | 26.42 | -28.77 |
| 250 | 7 | N | 7.62 | 52.2 | 9.29 | 55.1 | 1.67 | 2.9 | 3.38 | 18.56 | 5.75 | 24.31 | NA | 23 | 2 | 3 | 18.1 | 453.3 | 25.08 | -29.54 |
| 251 | 7 | N | 5.55 | 38.6 | 7.77 | 42.6 | 2.22 | 4 | 1.38 | 9.15 | 3.44 | 12.59 | 10.09 | 15 | 0 | 1 | 17 | 468.8 | 27.58 | -27.93 |
| 252 | 7 | N | 6.59 | 45.2 | 9.02 | 54.7 | 2.43 | 9.5 | 2.65 | 16.56 | 5.34 | 21.9 | 20.47 | 22 | 0 | 0 | 18.2 | 453.7 | 24.95 | -28.45 |
| 253 | 1 | ND | 3.96 | 32.2 | 6.21 | 34.2 | 2.25 | 2 | -0.2 | 5.12 | 1.72 | 6.84 | 6.94 | 7 | 4 | 3 | 19.95 | 451.65 | 22.63 | -29.02 |
| 254 | 1 | ND | 5.52 | 49.5 | 7.86 | 53 | 2.34 | 3.5 | 2.32 | 13.22 | 3.75 | 16.97 | NA | 16 | 3 | 2 | 21 | 471.1 | 22.41 | -29.08 |
| 255 | 1 | ND | 6.9 | 53.2 | 10.05 | 53.2 | 3.15 | 0 | 2.74 | 18.98 | 5.09 | 24.07 | 17.96 | 25 | 4 | 4 | 20.3 | 451.1 | 22.24 | -29.12 |
| 256 | 1 | ND | 5.87 | 46.5 | 8.6 | 46.7 | 2.73 | 0.2 | 1.56 | 16.02 | 3.65 | 19.67 | NA | 20 | 2 | 3 | 19.9 | 459.3 | 23.03 | -28.8 |
| 257 | 1 | ND | 6.18 | 43.6 | 9.38 | 34.4 | 3.2 | -9.2 | 0.81 | 15.39 | 3.96 | 19.35 | 12.56 | 30 | 44 | 16 | 20.6 | 455 | 22.12 | -29.14 |
| 258 | 1 | ND | 5.95 | 55.3 | 9.6 | 59.4 | 3.65 | 4.1 | 2.59 | 20.88 | 4.95 | 25.83 | NA | 22 | 7 | 0 | 19.2 | 463.95 | 24.14 | -29.15 |
| 259 | 1 | ND | 5.26 | 45.6 | 8.24 | 44.8 | 2.98 | -0.8 | 1.78 | 14.47 | 4.66 | 19.13 | NA | 16 | 5 | 0 | 20.2 | 462.3 | 22.84 | -28.83 |
| 260 | 1 | ND | 4.97 | 53.4 | 7.93 | 48.2 | 2.96 | -5.2 | 0.39 | 13.44 | 2.99 | 16.43 | NA | 10 | 5 | 1 | 20.2 | 466.5 | 23.12 | -28.85 |
| 261 | 1 | ND | 6.46 | 48.1 | 9.98 | 51.3 | 3.52 | 3.2 | 2.55 | 19.19 | 4.36 | 23.55 | 20.77 | 20 | 2 | 0 | 19.9 | 465.7 | 23.4 | -27.68 |
| 262 | 1 | ND | 6.28 | 47.5 | 9.18 | 50.4 | 2.9 | 2.9 | 2.12 | 15.69 | 4.45 | 20.14 | NA | 18 | 1 | 1 | 20.1 | 448.5 | 22.32 | -28.68 |
| 263 | 1 | ND | 5.49 | 47.2 | 8.8 | 48.7 | 3.31 | 1.5 | 1.06 | 16.23 | 3.69 | 19.92 | NA | 15 | 3 | 1 | 18.15 | 456.35 | 25.13 | -29.41 |
| 264 | 1 | ND | 4.28 | 33.7 | 6.7 | 38.6 | 2.42 | 4.9 | 0.27 | 7.36 | 2.43 | 9.79 | NA | 12 | 1 | 2 | 22.6 | 455.8 | 20.2 | -28.81 |
| 265 | 2 | ND | 6.89 | 51.9 | 9.64 | 52.9 | 2.75 | 1 | 3.92 | 17.39 | 5.25 | 22.64 | 23.46 | 33 | 1 | 0 | NA | NA | NA | NA |
| 266 | 2 | ND | 7.35 | 44.7 | 9.11 | 45.5 | 1.76 | 0.8 | 4.25 | 19.33 | 5.76 | 25.09 | NA | 24 | 1 | 0 | 17.4 | 468.8 | 26.88 | -29.16 |
| 267 | 2 | ND | 6.08 | 48.3 | 8.86 | 56.7 | 2.78 | 8.4 | 3.77 | 15.83 | 4.84 | 20.67 | NA | 23 | 0 | 3 | 16.8 | 458.6 | 27.35 | -28.59 |
| 268 | 2 | ND | 4.34 | 35.5 | 6.23 | 42.9 | 1.89 | 7.4 | 1.25 | 7.54 | 1.8 | 9.34 | NA | 14 | 0 | 1 | 24 | 471.6 | 19.65 | -29.26 |
| 269 | 2 | ND | 4.97 | 41.7 | 7.3 | 42.1 | 2.33 | 0.4 | 3 | 9.6 | 4.04 | 13.64 | NA | 18 | 0 | 2 | 15.5 | 459.7 | 29.72 | -28.81 |
| 270 | 2 | ND | 6.6 | 51.1 | 8.33 | 65.4 | 1.73 | 14.3 | 2.4 | 15.76 | 4.35 | 20.11 | NA | 23 | 0 | 0 | 16 | 451.4 | 28.21 | -28.69 |
| 271 | 2 | ND | 7.91 | 54 | 10.22 | 68.2 | 2.31 | 14.2 | 3.02 | 19.73 | 5.2 | 24.93 | NA | 23 | 0 | 0 | 14.9 | 463.2 | 31.17 | -30.1 |
| 272 | 2 | ND | 7.03 | 49.7 | 8.77 | 64.4 | 1.74 | 14.7 | 3.12 | 20.03 | 5.04 | 25.07 | NA | 21 | 1 | 1 | 17.4 | 476.3 | 27.36 | -29.12 |
| 273 | 2 | ND | 6.23 | 53.1 | NA | NA | NA | NA | NA | NA | NA | NA | 22.55 | NA | NA | NA | NA | NA | NA | NA |
| 274 | 2 | ND | 6.63 | 46.7 | 9.44 | 54.7 | 2.81 | 8 | 3.31 | 17.5 | 4.87 | 22.37 | 14.1 | 21 | 1 | 0 | 17.05 | 448.8 | 26.32 | -28.56 |
| 275 | 2 | ND | 6.94 | 49.3 | 8.85 | 65 | 1.91 | 15.7 | 3.99 | 19.94 | 5.85 | 25.79 | 18.27 | 27 | 0 | 1 | NA | NA | NA | NA |
| 276 | 2 | ND | 6.34 | 47.4 | 8.13 | 56.3 | 1.79 | 8.9 | 3.3 | 13.72 | 4.88 | 18.6 | NA | 17 | 0 | 1 | 15 | 479.6 | 31.9 | -29.3 |
| 277 | 3 | ND | 7.74 | 77.4 | 9.99 | 86 | 2.25 | 8.6 | 5.47 | 29.72 | 9.1 | 38.82 | NA | 28 | 1 | 0 | 13.5 | 473.4 | 35.05 | -29.45 |
| 278 | 3 | ND | 6.37 | 34 | 9.01 | 40.3 | 2.64 | 6.3 | 4 | 12.82 | 5.16 | 17.98 | NA | 14 | 2 | 1 | 18.1 | 473.8 | 26.11 | -28.82 |
| 279 | 3 | ND | 6.96 | 48.5 | 11.85 | 54.9 | 4.89 | 6.4 | 4.37 | 25.92 | 6.57 | 32.49 | NA | 30 | 7 | 6 | 19 | 470.6 | 24.76 | -30 |
| 280 | 3 | ND | 9.55 | 39.7 | 8.54 | 48.4 | -1.01 | 8.7 | 2.66 | 15.25 | 4.49 | 19.74 | NA | 18 | 1 | 1 | 17.1 | 468.85 | 27.47 | -29.07 |
| 281 | 3 | ND | 9.74 | 59.7 | 9.8 | 72.3 | 0.06 | 12.6 | 2.94 | 22.1 | 4.43 | 26.53 | 17.83 | 15 | 1 | 5 | 19.5 | 461.4 | 23.63 | -29.02 |
| 282 | 3 | ND | 6.5 | 46.5 | 9.84 | 63 | 3.34 | 16.5 | 5.31 | 25.52 | 7.49 | 33.01 | 18.9 | 29 | 0 | 0 | 15.9 | 472.4 | 29.72 | -28.87 |
| 283 | 3 | ND | 6.75 | 41.4 | 9.98 | 52.1 | 3.23 | 10.7 | 5.43 | 17.13 | 7.06 | 24.19 | 20.46 | 19 | 0 | 1 | 14.4 | 445.1 | 30.82 | -29.7 |
| 284 | 3 | ND | 6.85 | 55.6 | 9.33 | 71.8 | 2.48 | 16.2 | 3.54 | 21.56 | 5.36 | 26.92 | NA | 27 | 1 | 0 | 18.6 | 475.7 | 25.58 | -28.77 |
| 285 | 3 | ND | 5.91 | 35.6 | 8.42 | 50.2 | 2.51 | 14.6 | 4.72 | 15.71 | 6.68 | 22.39 | NA | 26 | 0 | 4 | 15.9 | 458.95 | 28.82 | -29.81 |
| 286 | 3 | ND | 6.49 | 56.4 | 9.18 | 56 | 2.69 | -0.4 | 4.72 | 18.08 | 6.55 | 24.63 | NA | 22 | 1 | 0 | 16.4 | 463.9 | 28.26 | -29.97 |
| 287 | 3 | ND | 6.46 | 58.8 | 8.34 | 61.3 | 1.88 | 2.5 | 4.97 | 17.94 | 6.27 | 24.21 | NA | 21 | 0 | 0 | 13.3 | 460.3 | 34.66 | -28.95 |
| 288 | 3 | ND | 5.81 | 38 | 8.54 | 48.4 | 2.73 | 10.4 | 2.69 | 13.14 | 3.78 | 16.92 | 12.32 | 17 | 0 | 4 | 17.9 | 447.6 | 24.95 | -29.05 |
| 289 | 4 | ND | 6.31 | 43.7 | 9.7 | 47 | 3.39 | 3.3 | 5.25 | 21.27 | 7.87 | 29.14 | NA | 24 | 4 | 1 | 15.6 | 459 | 29.33 | -28.41 |
| 290 | 4 | ND | 6.07 | 61.3 | 9.52 | 61.8 | 3.45 | 0.5 | 2.98 | 20.59 | 6.4 | 26.99 | NA | 19 | 2 | 1 | 15.5 | 460.3 | 29.65 | -29.92 |
| 291 | 4 | ND | 6.08 | 48.4 | 8.76 | 56.3 | 2.68 | 7.9 | 3.94 | 16.15 | 5.32 | 21.47 | 18.04 | 23 | 3 | 2 | 18 | 475.5 | 26.44 | -28.19 |
| 292 | 4 | ND | 6.73 | 74.8 | 10.52 | 71.6 | 3.79 | -3.2 | 4.01 | 30.22 | 6.61 | 36.83 | 17.2 | 29 | 1 | 0 | 18.4 | 470.2 | 25.55 | -28.46 |
| 293 | 4 | ND | 7.01 | 47 | 9.66 | 63.4 | 2.65 | 16.4 | 5.64 | 23.84 | 7.24 | 31.08 | NA | 32 | 1 | 2 | 16.4 | 462.2 | 28.2 | -29.53 |
| 294 | 4 | ND | 5.9 | 58 | 8.19 | 55.1 | 2.29 | -2.9 | 2.6 | 16.94 | 5.17 | 22.11 | NA | 30 | 2 | 0 | 18.05 | 457.65 | 25.39 | -27.95 |
| 295 | 4 | ND | 6.59 | 54.1 | 9.41 | 63 | 2.82 | 8.9 | 2.34 | 20.37 | 4.58 | 24.95 | 15.15 | 24 | 1 | 0 | 19.7 | 476.3 | 24.18 | -28.57 |
| 296 | 4 | ND | 6.05 | 58.2 | 8.45 | 60.3 | 2.4 | 2.1 | 2.75 | 16.53 | 4.26 | 20.79 | NA | 23 | 0 | 1 | 20.3 | 469.4 | 23.12 | -27.76 |
| 297 | 4 | ND | 6.52 | 67.4 | 9.18 | 65.2 | 2.66 | -2.2 | 2.99 | 22.94 | 7.4 | 30.34 | 15.81 | 27 | 1 | 0 | 14.9 | 448.2 | 30.18 | -28.59 |
| 298 | 4 | ND | 6.11 | 59.5 | 9.39 | 67 | 3.28 | 7.5 | 4.82 | 22.99 | 7.32 | 30.31 | NA | 31 | 1 | 0 | 16.3 | 467.7 | 28.62 | -28.22 |
| 299 | 4 | ND | 5.85 | 43.6 | 7.51 | 49.6 | 1.66 | 6 | 1.99 | 12.46 | 3.23 | 15.69 | NA | 24 | 2 | 0 | 19.8 | 463.1 | 23.42 | -28.85 |
| 300 | 4 | ND | 6.28 | 49.9 | 8.92 | 58 | 2.64 | 8.1 | 3.1 | 18.23 | 4.07 | 22.3 | NA | 26 | 3 | 1 | 19 | 468.4 | 24.68 | -28.31 |
| 301 | 5 | ND | 7 | 41.6 | 8.79 | 42.4 | 1.79 | 0.8 | 2.45 | 13.82 | 3.75 | 17.57 | NA | 18 | 0 | 0 | 20 | 450.1 | 22.52 | -28.85 |
| 302 | 5 | ND | 5.77 | 36.2 | 8.23 | 37.7 | 2.46 | 1.5 | 1.97 | 11.64 | 4 | 15.64 | NA | 19 | 0 | 0 | 18.4 | 448.2 | 24.31 | -28.63 |
| 303 | 5 | ND | 6.43 | 43.8 | 8.08 | 43.4 | 1.65 | -0.4 | 2.65 | 11.85 | 4.88 | 16.73 | 16.73 | 18 | 5 | 3 | 17.5 | 463.3 | 26.48 | -29.13 |
| 304 | 5 | ND | 5 | 32.1 | 7.05 | 36 | 2.05 | 3.9 | 1.14 | 7.22 | 2.96 | 10.18 | 9.1 | 12 | 2 | 1 | 20.9 | 457.1 | 21.85 | -27.97 |
| 305 | 5 | ND | 5.9 | 40.7 | 9.04 | 55.5 | 3.14 | 14.8 | 3.18 | 17.24 | 4.85 | 22.09 | 22.31 | 26 | 1 | 3 | 17.8 | 476.25 | 26.78 | -28.38 |
| 306 | 5 | ND | 6.98 | 40 | 9.39 | 51.9 | 2.41 | 11.9 | 2.88 | 18.4 | 5.22 | 23.62 | NA | 27 | 2 | 0 | 17.2 | 438.2 | 25.48 | -29.16 |
| 307 | 5 | ND | 5.41 | 40.2 | 8.09 | 46.4 | 2.68 | 6.2 | 2.97 | 13.55 | 4.74 | 18.29 | NA | 27 | 2 | 3 | 19.2 | 451.1 | 23.5 | -29.22 |
| 308 | 5 | ND | 6.27 | 42.5 | 8.63 | 45.8 | 2.36 | 3.3 | 2.17 | 13.61 | 3.89 | 17.5 | 18.54 | 19 | 6 | 5 | 21.8 | 457.8 | 20.98 | -28.48 |
| 309 | 5 | ND | 6.7 | 54.7 | 9.25 | 75 | 2.55 | 20.3 | 4.41 | 21.69 | 5.97 | 27.66 | NA | 23 | 0 | 0 | 13 | 446.8 | 34.27 | -29.47 |
| 310 | 5 | ND | 5.84 | 39.4 | 7.89 | 55 | 2.05 | 15.6 | 3.4 | 13.28 | 4.14 | 17.42 | NA | 20 | 1 | 1 | 16.7 | 457.2 | 27.37 | -28.49 |
| 311 | 5 | ND | 6.97 | 39.6 | 8.79 | 45.8 | 1.82 | 6.2 | 2.41 | 15.31 | 5.11 | 20.42 | NA | 19 | 1 | 0 | 17.3 | 445.2 | 25.78 | -29.44 |
| 312 | 5 | ND | 6.09 | 43 | 8.82 | 45.1 | 2.73 | 2.1 | 3.69 | 13.6 | 4.49 | 18.09 | NA | 24 | 3 | 0 | 20.5 | 452.2 | 22.05 | -28.45 |
| 313 | 6 | ND | 7.56 | 47.6 | 10.55 | 64 | 2.99 | 16.4 | 3.76 | 22.95 | 5.91 | 28.86 | NA | 32 | 0 | 0 | 16.6 | 465.5 | 28.11 | -29.04 |
| 314 | 6 | ND | 7.19 | 41.7 | 10.27 | 52 | 3.08 | 10.3 | 2.66 | 17.67 | 4.85 | 22.52 | 18.3 | 18 | 2 | 0 | 16.1 | 471.6 | 29.24 | -29.95 |
| 315 | 6 | ND | 5.77 | 45.5 | 8.44 | 62.7 | 2.67 | 17.2 | 2.04 | 14.84 | 3.69 | 18.53 | 11.15 | NA | 2 | 11 | 19.35 | 458 | 23.71 | -29.66 |
| 316 | 6 | ND | 6.08 | 52.5 | 9.05 | 59.8 | 2.97 | 7.3 | 3.13 | 17.77 | 4.38 | 22.15 | NA | 25 | 1 | 0 | 17.2 | 466.8 | 27.21 | -30.28 |
| 317 | 6 | ND | 5.61 | 40.4 | 7.92 | 51.8 | 2.31 | 11.4 | 2.64 | 13.06 | 3.27 | 16.33 | NA | 20 | 1 | 0 | 19.4 | 463.6 | 23.96 | -28.12 |
| 318 | 6 | ND | 7.6 | 50.1 | 9.2 | 55 | 1.6 | 4.9 | 3.53 | 19.97 | 5.39 | 25.36 | NA | 27 | 1 | 0 | 16.5 | 462.3 | 28.02 | -29.26 |
| 319 | 6 | ND | 7.52 | 48.5 | 8.94 | 60.2 | 1.42 | 11.7 | 2.82 | 16.43 | 4.39 | 20.82 | 13.45 | 22 | 0 | 1 | 16.7 | 458 | 27.4 | -29.84 |
| 320 | 6 | ND | 6.64 | 49 | 8.59 | 55.3 | 1.95 | 6.3 | 2.94 | 16.14 | 4.81 | 20.95 | NA | 33 | 1 | 1 | 19.7 | 453.1 | 22.97 | -29.17 |
| 321 | 6 | ND | 7.46 | 43.5 | 9.28 | 52.3 | 1.82 | 8.8 | 2.47 | 17.69 | 4.6 | 22.29 | NA | 32 | 0 | 0 | 19.6 | 464.7 | 23.74 | -28.55 |
| 322 | 6 | ND | 7.6 | 73.4 | 11.07 | 92 | 3.47 | 18.6 | 5.03 | 33.24 | 6.56 | 39.8 | 24.59 | 38 | 1 | 1 | 15.5 | 467.7 | 30.26 | -29.73 |
| 323 | 6 | ND | 5.87 | 43.8 | 7.26 | 44.4 | 1.39 | 0.6 | 1.61 | 11.58 | 2.79 | 14.37 | NA | 25 | 3 | 0 | 20.3 | 461.7 | 22.74 | -28.61 |
| 324 | 6 | ND | 5.48 | 33.5 | 7.92 | 51.1 | 2.44 | 17.6 | 3.6 | 14.63 | 4.84 | 19.47 | NA | 23 | 0 | 0 | 15.5 | 463.2 | 29.97 | -29.04 |
| 325 | 7 | ND | 6.92 | 45.5 | 9.67 | 50.3 | 2.75 | 4.8 | 4.42 | 18.82 | 7.54 | 26.36 | NA | 21 | 2 | 0 | 14.3 | 450.9 | 31.47 | -28.92 |
| 326 | 7 | ND | 7.72 | 58.4 | 9.98 | 65.5 | 2.26 | 7.1 | 3.41 | 27.62 | 6.73 | 34.35 | NA | 26 | 0 | 1 | 16.3 | 458.8 | 28.19 | -28.6 |
| 327 | 7 | ND | 6.85 | 42.3 | 9.08 | 45.7 | 2.23 | 3.4 | 2.11 | 12.43 | 4.29 | 16.72 | NA | 18 | 0 | 0 | 17.9 | 454.4 | 25.43 | -29.12 |
| 328 | 7 | ND | 5.23 | 39 | 6.28 | 41.8 | 1.05 | 2.8 | 0.95 | 7.22 | 1.99 | 9.21 | 8.03 | 14 | 0 | 0 | NA | NA | NA | NA |
| 329 | 7 | ND | 6.04 | 39.4 | 7.88 | 51.5 | 1.84 | 12.1 | 2.93 | 11.14 | 3.78 | 14.92 | NA | 28 | 0 | 0 | 22 | 461.1 | 20.98 | -28.89 |
| 330 | 7 | ND | 6.76 | 45.6 | 8.73 | 50.7 | 1.97 | 5.1 | 3.85 | 18.49 | 6.35 | 24.84 | 29.27 | 25 | 1 | 0 | 17.2 | 458.5 | 26.67 | -29.11 |
| 331 | 7 | ND | 6.75 | 47.3 | 8.9 | 42.9 | 2.15 | -4.4 | 1.92 | 13.56 | 4.33 | 17.89 | 14.15 | 19 | 3 | 4 | 18.9 | 458.6 | 24.3 | -28.09 |
| 332 | 7 | ND | 6.17 | 41 | 8.05 | 48.2 | 1.88 | 7.2 | 2.99 | 14.05 | 4.95 | 19 | 15.42 | 24 | 1 | 1 | 17.8 | 447.3 | 25.12 | -29.54 |
| 333 | 7 | ND | 6.3 | 38.4 | 8.14 | 40.3 | 1.84 | 1.9 | 2.62 | 13.38 | 4.22 | 17.6 | NA | 15 | 1 | 0 | NA | NA | NA | NA |
| 334 | 7 | ND | 6.37 | 45.8 | 9.04 | 49.3 | 2.67 | 3.5 | 3.4 | 15.99 | 6.08 | 22.07 | NA | 21 | 2 | 0 | 19.4 | 462 | 23.84 | -29.18 |
| 335 | 7 | ND | 6.55 | 39.2 | 10.29 | 44.6 | 3.74 | 5.4 | 2.68 | 15.49 | 4.97 | 20.46 | NA | 23 | 0 | 0 | 18.65 | 454.85 | 24.34 | -29.33 |
| 336 | 7 | ND | 6.27 | 39.8 | 7.82 | 42.2 | 1.55 | 2.4 | 2.28 | 9.99 | 3.55 | 13.54 | NA | 23 | 2 | 1 | 19.9 | 458.6 | 23.05 | -28.29 |

**Table S4**: Data for one-year-old and two-year-old trees (comparisons of shoot:root ratios and leaf δ13 signatures).

| Forest_site | Age | Treatment | SRR | Leaf_d13C |
| --- | --- | --- | --- | --- |
| 1 | 1 | C | 1.218 | -29.955 |
| 1 | 1 | C | 1.818 | -30.124 |
| 1 | 1 | C | 1.576 | -30.574 |
| 1 | 1 | C | 1.5 | -28.112 |
| 1 | 1 | C | 1.558 | -30.353 |
| 1 | 1 | C | 1.803 | -29.947 |
| 1 | 1 | C | 1.62 | -30.241 |
| 1 | 1 | C | 1.397 | -30.347 |
| 1 | 1 | C | 1.601 | -30.084 |
| 1 | 1 | C | 1.727 | -30.123 |
| 2 | 1 | C | 2.592 | -29.794 |
| 2 | 1 | C | 2.961 | -29.935 |
| 2 | 1 | C | 2.247 | -29.647 |
| 2 | 1 | C | 1.908 | -30.34 |
| 2 | 1 | C | 1.61 | -29.52 |
| 2 | 1 | C | 2.348 | -30.274 |
| 2 | 1 | C | 2.591 | -30.097 |
| 2 | 1 | C | 1.566 | -30.319 |
| 2 | 1 | C | 2.692 | -30.291 |
| 2 | 1 | C | 2.662 | -30.28 |
| 3 | 1 | C | 1.289 | -28.726 |
| 3 | 1 | C | 1.784 | -30.087 |
| 3 | 1 | C | 1.361 | -29.543 |
| 3 | 1 | C | 1.994 | -29.788 |
| 3 | 1 | C | 1.765 | -29.277 |
| 3 | 1 | C | 1.918 | -29.676 |
| 3 | 1 | C | 1.168 | -30.129 |
| 3 | 1 | C | 2.079 | -30.578 |
| 3 | 1 | C | 1.602 | -29.933 |
| 3 | 1 | C | 1.62 | -29.77 |
| 4 | 1 | C | 1.274 | -29.299 |
| 4 | 1 | C | 1.73 | -29.486 |
| 4 | 1 | C | 2.509 | -28.568 |
| 4 | 1 | C | 1.788 | -28.829 |
| 4 | 1 | C | 1.737 | -29.332 |
| 4 | 1 | C | 1.76 | -28.768 |
| 4 | 1 | C | 1.405 | -29.11 |
| 4 | 1 | C | 1.868 | -28.389 |
| 4 | 1 | C | 1.618 | -29.209 |
| 4 | 1 | C | 1.381 | -28.984 |
| 5 | 1 | C | 1.4 | -28.896 |
| 5 | 1 | C | 2.185 | -29.925 |
| 5 | 1 | C | 1.835 | -28.741 |
| 5 | 1 | C | 1.761 | -28.746 |
| 5 | 1 | C | 1.996 | -28.171 |
| 5 | 1 | C | 1.947 | -29.705 |
| 5 | 1 | C | 1.735 | -28.456 |
| 5 | 1 | C | 2.011 | -28.899 |
| 5 | 1 | C | 1.982 | -28.697 |
| 5 | 1 | C | 2.039 | -28.463 |
| 6 | 1 | C | 1.791 | -28.26 |
| 6 | 1 | C | 1.739 | -28.641 |
| 6 | 1 | C | 1.762 | -28.658 |
| 6 | 1 | C | 2.194 | -29.28 |
| 6 | 1 | C | 1.663 | -29.877 |
| 6 | 1 | C | 1.406 | -26.767 |
| 6 | 1 | C | 0.994 | -28.118 |
| 6 | 1 | C | 1.08 | -28.651 |
| 6 | 1 | C | 0.762 | -27.201 |
| 6 | 1 | C | 0.89 | -29.181 |
| 7 | 1 | C | 1.188 | -28.57 |
| 7 | 1 | C | 1.771 | -28.74 |
| 7 | 1 | C | 1.612 | -30.21 |
| 7 | 1 | C | 1.5 | -29.587 |
| 7 | 1 | C | 1.864 | -29.313 |
| 7 | 1 | C | 2.239 | -30.054 |
| 7 | 1 | C | 1.48 | -28.91 |
| 7 | 1 | C | 2.312 | -30.066 |
| 7 | 1 | C | 0.656 | -27.322 |
| 7 | 1 | C | 1.629 | -29.115 |
| 8 | 1 | C | 1.349 | -29.039 |
| 8 | 1 | C | 1.811 | -29.642 |
| 8 | 1 | C | 2.58 | -28.694 |
| 8 | 1 | C | 2.217 | -29.943 |
| 8 | 1 | C | 2.559 | -29.71 |
| 8 | 1 | C | 1.71 | -29.637 |
| 8 | 1 | C | 2.263 | -29.779 |
| 8 | 1 | C | 2.022 | -30.058 |
| 8 | 1 | C | 2.31 | -29.173 |
| 8 | 1 | C | 1.786 | -29.958 |
| 1 | 1 | D | 1.848 | -29.775 |
| 1 | 1 | D | 2.066 | -29.861 |
| 1 | 1 | D | 1.914 | -29.98 |
| 1 | 1 | D | 1.865 | -28.089 |
| 1 | 1 | D | 1.707 | -29.109 |
| 1 | 1 | D | 2.382 | -28.945 |
| 1 | 1 | D | 2.061 | -29.041 |
| 1 | 1 | D | 2.105 | -29.747 |
| 1 | 1 | D | 2.254 | -29.133 |
| 1 | 1 | D | 2.102 | -29.478 |
| 2 | 1 | D | 2.623 | -28.417 |
| 2 | 1 | D | 2.469 | -28.725 |
| 2 | 1 | D | 2.249 | -30.244 |
| 2 | 1 | D | 2.852 | -28.537 |
| 2 | 1 | D | 1.373 | -30.711 |
| 2 | 1 | D | 1.69 | -29.776 |
| 2 | 1 | D | 2.357 | -29.046 |
| 2 | 1 | D | 2.218 | -29.102 |
| 2 | 1 | D | 2.634 | -29.154 |
| 2 | 1 | D | 2.406 | -28.846 |
| 3 | 1 | D | 1.379 | -29.509 |
| 3 | 1 | D | 1.995 | -28.662 |
| 3 | 1 | D | 1.941 | -28.944 |
| 3 | 1 | D | 2.331 | -29.255 |
| 3 | 1 | D | 2.308 | -28.785 |
| 3 | 1 | D | 2.36 | -28.289 |
| 3 | 1 | D | 1.468 | -29.049 |
| 3 | 1 | D | 2.44 | -28.138 |
| 3 | 1 | D | 2.448 | -28.373 |
| 3 | 1 | D | 1.657 | -29.853 |
| 4 | 1 | D | 2.551 | -27.809 |
| 4 | 1 | D | 1.783 | -27.74 |
| 4 | 1 | D | 2.998 | -28.087 |
| 4 | 1 | D | 2.775 | -26.937 |
| 4 | 1 | D | 2.744 | -27.839 |
| 4 | 1 | D | 3.821 | -27.555 |
| 4 | 1 | D | 1.705 | -27.897 |
| 4 | 1 | D | 1.762 | -29.354 |
| 4 | 1 | D | 2.398 | -28.678 |
| 4 | 1 | D | 1.783 | -28.191 |
| 5 | 1 | D | 1.738 | -28.036 |
| 5 | 1 | D | 1.935 | -28.568 |
| 5 | 1 | D | 1.916 | -29.297 |
| 5 | 1 | D | 2.234 | -28.577 |
| 5 | 1 | D | 2.74 | -28.042 |
| 5 | 1 | D | 2.539 | -28.671 |
| 5 | 1 | D | 1.776 | -28.005 |
| 5 | 1 | D | 1.32 | -28.624 |
| 5 | 1 | D | 2.168 | -28.358 |
| 5 | 1 | D | 2.558 | -28.84 |
| 6 | 1 | D | 1.566 | -28.082 |
| 6 | 1 | D | 1.762 | -27.045 |
| 6 | 1 | D | 1.36 | -28.564 |
| 6 | 1 | D | 1.432 | -28.705 |
| 6 | 1 | D | 2.472 | -27.174 |
| 6 | 1 | D | 2.545 | -27.735 |
| 6 | 1 | D | 2.02 | -27.913 |
| 6 | 1 | D | 1.978 | -27.926 |
| 6 | 1 | D | 2.012 | -28.394 |
| 6 | 1 | D | 1.21 | -28.097 |
| 7 | 1 | D | 1.401 | -30.555 |
| 7 | 1 | D | 1.368 | -28.983 |
| 7 | 1 | D | 1.499 | -29.359 |
| 7 | 1 | D | 2.002 | -29.326 |
| 7 | 1 | D | 1.789 | -29.083 |
| 7 | 1 | D | 1.555 | -29.291 |
| 7 | 1 | D | 1.472 | -29.737 |
| 7 | 1 | D | 2.435 | -28.694 |
| 7 | 1 | D | 1.432 | -28.837 |
| 7 | 1 | D | 2.005 | -29.126 |
| 8 | 1 | D | 1.796 | -29.886 |
| 8 | 1 | D | 1.838 | -29.558 |
| 8 | 1 | D | 1.471 | -29.831 |
| 8 | 1 | D | 1.597 | -28.974 |
| 8 | 1 | D | 1.702 | -29.859 |
| 8 | 1 | D | 1.015 | -30.751 |
| 8 | 1 | D | 3.539 | -27.552 |
| 8 | 1 | D | 1.611 | -29.432 |
| 8 | 1 | D | 1.473 | -28.201 |
| 8 | 1 | D | 1.563 | -29.854 |
| 1 | 1 | N | 1.529 | -30.298 |
| 1 | 1 | N | 1.646 | -29.791 |
| 1 | 1 | N | 1.66 | -30.894 |
| 1 | 1 | N | 1.871 | -30.4 |
| 1 | 1 | N | 1.814 | -30.304 |
| 1 | 1 | N | 2.93 | -30.755 |
| 1 | 1 | N | 1.579 | -29.851 |
| 1 | 1 | N | 1.619 | -29.716 |
| 1 | 1 | N | 1.635 | -29.395 |
| 1 | 1 | N | 1.368 | -28.46 |
| 2 | 1 | N | 2.066 | -29.14 |
| 2 | 1 | N | 2.637 | -30.194 |
| 2 | 1 | N | 2.324 | -29.902 |
| 2 | 1 | N | 2.212 | -30.286 |
| 2 | 1 | N | 2.255 | -29.742 |
| 2 | 1 | N | 3.108 | -29.644 |
| 2 | 1 | N | 2.664 | -30.526 |
| 2 | 1 | N | 1.968 | -29.996 |
| 2 | 1 | N | 2.748 | -30.296 |
| 2 | 1 | N | 2.534 | -29.828 |
| 3 | 1 | N | 1.389 | -28.631 |
| 3 | 1 | N | 1.428 | -29.267 |
| 3 | 1 | N | 1.463 | -29.575 |
| 3 | 1 | N | 2.183 | -28.363 |
| 3 | 1 | N | 2.102 | -28.077 |
| 3 | 1 | N | 2.375 | -29.09 |
| 3 | 1 | N | 2.025 | -28.971 |
| 3 | 1 | N | 2.094 | -28.714 |
| 3 | 1 | N | 2.159 | -28.656 |
| 3 | 1 | N | 1.586 | -28.789 |
| 4 | 1 | N | 1.482 | -29.165 |
| 4 | 1 | N | 1.515 | -28.213 |
| 4 | 1 | N | 1.698 | -29.274 |
| 4 | 1 | N | 1.835 | -30.029 |
| 4 | 1 | N | 2.746 | -28.954 |
| 4 | 1 | N | 1.947 | -29.451 |
| 4 | 1 | N | 1.53 | -29.694 |
| 4 | 1 | N | 1.655 | -28.791 |
| 4 | 1 | N | 1.7 | -28.781 |
| 4 | 1 | N | 1.429 | -28.192 |
| 5 | 1 | N | 1.646 | -27.838 |
| 5 | 1 | N | 1.888 | -28.849 |
| 5 | 1 | N | 2.436 | -28.908 |
| 5 | 1 | N | 1.539 | -29.496 |
| 5 | 1 | N | 1.344 | -28.977 |
| 5 | 1 | N | 2.521 | -28.267 |
| 5 | 1 | N | 2.098 | -28.396 |
| 5 | 1 | N | 2.198 | -28.976 |
| 5 | 1 | N | 2.32 | -29.177 |
| 5 | 1 | N | 1.597 | -28.379 |
| 6 | 1 | N | 1.443 | -29.168 |
| 6 | 1 | N | 1.76 | -28.047 |
| 6 | 1 | N | 1.072 | -27.802 |
| 6 | 1 | N | 0.981 | -28.17 |
| 6 | 1 | N | 1.267 | -29.109 |
| 6 | 1 | N | 1.519 | -28.387 |
| 6 | 1 | N | 1.786 | -27.795 |
| 6 | 1 | N | 2.043 | -29.3 |
| 6 | 1 | N | 1.604 | -29.846 |
| 6 | 1 | N | 1.6 | -29.239 |
| 7 | 1 | N | 1.895 | -29.908 |
| 7 | 1 | N | 1.147 | -29.767 |
| 7 | 1 | N | 1.285 | -29.894 |
| 7 | 1 | N | 1.24 | -30.12 |
| 7 | 1 | N | 1.326 | -29.001 |
| 7 | 1 | N | 1.869 | -30.846 |
| 7 | 1 | N | 2.075 | -29.535 |
| 7 | 1 | N | 2.336 | -29.222 |
| 7 | 1 | N | 2.584 | -29.955 |
| 7 | 1 | N | 1.721 | -30.484 |
| 8 | 1 | N | 1.643 | -29.919 |
| 8 | 1 | N | 1.924 | -29.095 |
| 8 | 1 | N | 2.261 | -30.141 |
| 8 | 1 | N | 1.348 | -29.179 |
| 8 | 1 | N | 1.468 | -29.44 |
| 8 | 1 | N | 1.548 | -29.078 |
| 8 | 1 | N | 1.685 | -30.351 |
| 8 | 1 | N | 3.051 | -28.947 |
| 8 | 1 | N | 1.576 | -29.997 |
| 8 | 1 | N | 1.206 | -29.748 |
| 1 | 1 | ND | 0.683 | -29.666 |
| 1 | 1 | ND | 1.72 | -29.591 |
| 1 | 1 | ND | 1.416 | -30.46 |
| 1 | 1 | ND | 1.583 | -29.986 |
| 1 | 1 | ND | 2.022 | -29.492 |
| 1 | 1 | ND | 1.73 | -29.511 |
| 1 | 1 | ND | 2.118 | -29.566 |
| 1 | 1 | ND | 1.538 | -30.23 |
| 1 | 1 | ND | 2.338 | -30.233 |
| 1 | 1 | ND | 1.557 | -29.728 |
| 2 | 1 | ND | 3.189 | -30.103 |
| 2 | 1 | ND | 2.376 | -29.241 |
| 2 | 1 | ND | 2.027 | -29.761 |
| 2 | 1 | ND | 2.647 | -29.264 |
| 2 | 1 | ND | 2.327 | -28.938 |
| 2 | 1 | ND | 1.971 | -29.657 |
| 2 | 1 | ND | 2.139 | -29.87 |
| 2 | 1 | ND | 2.951 | -28.724 |
| 2 | 1 | ND | 2.188 | -28.815 |
| 2 | 1 | ND | 2.017 | -28.492 |
| 3 | 1 | ND | 2.48 | -28.35 |
| 3 | 1 | ND | 2.062 | -28.217 |
| 3 | 1 | ND | 2.423 | -28.446 |
| 3 | 1 | ND | 2.952 | -27.863 |
| 3 | 1 | ND | 1.87 | -29.466 |
| 3 | 1 | ND | 1.982 | -27.852 |
| 3 | 1 | ND | 2.073 | -28.133 |
| 3 | 1 | ND | 2.826 | -27.405 |
| 3 | 1 | ND | 1.578 | -28.486 |
| 3 | 1 | ND | 2.387 | -28.476 |
| 4 | 1 | ND | 2.808 | -28.367 |
| 4 | 1 | ND | 3.401 | -27.174 |
| 4 | 1 | ND | 1.714 | -27.59 |
| 4 | 1 | ND | 3.163 | -28.375 |
| 4 | 1 | ND | 2.939 | -28.636 |
| 4 | 1 | ND | 2.956 | -27.823 |
| 4 | 1 | ND | 2.025 | -28.416 |
| 4 | 1 | ND | 2.819 | -28.441 |
| 4 | 1 | ND | 2.49 | -27.177 |
| 4 | 1 | ND | 1.53 | -29.012 |
| 5 | 1 | ND | 3.029 | -28.626 |
| 5 | 1 | ND | 2.735 | -27.885 |
| 5 | 1 | ND | 2.06 | -27.792 |
| 5 | 1 | ND | 1.899 | -28.811 |
| 5 | 1 | ND | 1.696 | -28.699 |
| 5 | 1 | ND | 4.574 | -28.122 |
| 5 | 1 | ND | 1.455 | -27.504 |
| 5 | 1 | ND | 1.922 | -27.371 |
| 5 | 1 | ND | 4.786 | -28.153 |
| 5 | 1 | ND | 2.305 | -28.956 |
| 6 | 1 | ND | 1.6 | -27.782 |
| 6 | 1 | ND | 2.032 | -27.953 |
| 6 | 1 | ND | 2.471 | -27.912 |
| 6 | 1 | ND | 1.275 | -27.599 |
| 6 | 1 | ND | 0.883 | -28.064 |
| 6 | 1 | ND | 2.227 | -27.402 |
| 6 | 1 | ND | 0.948 | -28.483 |
| 6 | 1 | ND | 1.96 | -27.834 |
| 6 | 1 | ND | 1.058 | -28.565 |
| 6 | 1 | ND | 1.623 | -27.771 |
| 7 | 1 | ND | 1.505 | -29.357 |
| 7 | 1 | ND | 1.758 | -29.482 |
| 7 | 1 | ND | 1.09 | -29.165 |
| 7 | 1 | ND | 1.613 | -28.464 |
| 7 | 1 | ND | 1.743 | -29.569 |
| 7 | 1 | ND | 1.872 | -29.209 |
| 7 | 1 | ND | 1.809 | -29.352 |
| 7 | 1 | ND | 1.281 | -30.52 |
| 7 | 1 | ND | 1.394 | -29.508 |
| 7 | 1 | ND | 1.331 | -28.963 |
| 8 | 1 | ND | 2.321 | -28.311 |
| 8 | 1 | ND | 1.536 | -29.759 |
| 8 | 1 | ND | 1.9 | -29.934 |
| 8 | 1 | ND | 2.628 | -30.465 |
| 8 | 1 | ND | 2.308 | -29.495 |
| 8 | 1 | ND | 1.853 | -29.376 |
| 8 | 1 | ND | 1.259 | -29.557 |
| 8 | 1 | ND | 1.465 | -27.661 |
| 8 | 1 | ND | 1.811 | -29.499 |
| 8 | 1 | ND | 2.22 | -29.401 |
| 1 | 2 | C | 0.86 | -29.37 |
| 1 | 2 | C | 1.06 | -29.058 |
| 1 | 2 | C | NA | -28.658 |
| 1 | 2 | C | 1.33 | -28.114 |
| 1 | 2 | C | NA | -28.557 |
| 1 | 2 | C | NA | -30.135 |
| 1 | 2 | C | NA | -28.639 |
| 1 | 2 | C | NA | -29.068 |
| 1 | 2 | C | 1.51 | -29.293 |
| 1 | 2 | C | NA | -27.445 |
| 1 | 2 | C | NA | -28.386 |
| 11 | 2 | C | NA | -28.604 |
| 11 | 2 | C | NA | -27.853 |
| 11 | 2 | C | 1.42 | -29.872 |
| 11 | 2 | C | NA | -27.907 |
| 11 | 2 | C | NA | -29.289 |
| 11 | 2 | C | NA | -29.351 |
| 11 | 2 | C | NA | -29.965 |
| 11 | 2 | C | 1.52 | -29.856 |
| 11 | 2 | C | 1.07 | -28.54 |
| 11 | 2 | C | NA | -29.728 |
| 11 | 2 | C | 1 | -28 |
| 11 | 2 | C | NA | -28.909 |
| 13 | 2 | C | NA | -30.918 |
| 13 | 2 | C | NA | -29.014 |
| 13 | 2 | C | 1.38 | -29.953 |
| 13 | 2 | C | 1.24 | -29.332 |
| 13 | 2 | C | NA | -29.251 |
| 13 | 2 | C | NA | -28.579 |
| 13 | 2 | C | NA | -29.165 |
| 13 | 2 | C | 1.08 | -28.502 |
| 13 | 2 | C | NA | -29.519 |
| 13 | 2 | C | 1.01 | -30.48 |
| 13 | 2 | C | NA | -29.602 |
| 13 | 2 | C | NA | -29.18 |
| 14 | 2 | C | NA | -27.967 |
| 14 | 2 | C | NA | -27.993 |
| 14 | 2 | C | 1.59 | -29.25 |
| 14 | 2 | C | 1.08 | -28.062 |
| 14 | 2 | C | NA | -29.31 |
| 14 | 2 | C | NA | -27.622 |
| 14 | 2 | C | NA | -28.272 |
| 14 | 2 | C | NA | -29.574 |
| 14 | 2 | C | NA | -28.581 |
| 14 | 2 | C | 1.89 | -29.751 |
| 14 | 2 | C | NA | -28.514 |
| 16 | 2 | C | NA | -29.064 |
| 16 | 2 | C | 1.2 | -28.811 |
| 16 | 2 | C | NA | -28.907 |
| 16 | 2 | C | NA | -28.276 |
| 16 | 2 | C | 1.34 | -28.454 |
| 16 | 2 | C | NA | -28.53 |
| 16 | 2 | C | NA | -29.209 |
| 16 | 2 | C | NA | -28.413 |
| 16 | 2 | C | NA | -28.74 |
| 16 | 2 | C | 1.24 | -29.575 |
| 16 | 2 | C | NA | -28.512 |
| 16 | 2 | C | 1.24 | -28.969 |
| 17 | 2 | C | NA | -29.154 |
| 17 | 2 | C | NA | -30.363 |
| 17 | 2 | C | NA | -30.266 |
| 17 | 2 | C | 1.25 | NA |
| 17 | 2 | C | NA | -29.354 |
| 17 | 2 | C | 1.1 | -28.542 |
| 17 | 2 | C | NA | -30.038 |
| 17 | 2 | C | 1.05 | -29.572 |
| 17 | 2 | C | NA | -29.409 |
| 17 | 2 | C | NA | -30.301 |
| 17 | 2 | C | NA | -30.786 |
| 17 | 2 | C | 0.94 | -30.455 |
| 19 | 2 | C | 1.08 | -29.731 |
| 19 | 2 | C | 0.81 | -30.186 |
| 19 | 2 | C | 1.08 | -28.374 |
| 19 | 2 | C | NA | -27.785 |
| 19 | 2 | C | NA | -28.199 |
| 19 | 2 | C | NA | -28.588 |
| 19 | 2 | C | NA | -29.174 |
| 19 | 2 | C | 1.04 | NA |
| 19 | 2 | C | NA | -28.413 |
| 19 | 2 | C | NA | -28.904 |
| 19 | 2 | C | NA | -29.249 |
| 1 | 2 | D | NA | -28.334 |
| 1 | 2 | D | NA | -29.383 |
| 1 | 2 | D | NA | -29.125 |
| 1 | 2 | D | NA | -29.187 |
| 1 | 2 | D | 1.32 | -28.378 |
| 1 | 2 | D | NA | -27.914 |
| 1 | 2 | D | 1.56 | -29.982 |
| 1 | 2 | D | NA | -29.078 |
| 1 | 2 | D | NA | -28.594 |
| 1 | 2 | D | 1.01 | -28.247 |
| 1 | 2 | D | 1.29 | -29.537 |
| 1 | 2 | D | NA | -29.487 |
| 11 | 2 | D | 1.23 | -29.356 |
| 11 | 2 | D | 0.78 | -29.452 |
| 11 | 2 | D | NA | -29.399 |
| 11 | 2 | D | NA | -30.009 |
| 11 | 2 | D | NA | -28.63 |
| 11 | 2 | D | 1.14 | -30.17 |
| 11 | 2 | D | 0.92 | -29.972 |
| 11 | 2 | D | NA | -30.72 |
| 11 | 2 | D | NA | -28.391 |
| 11 | 2 | D | NA | -29.397 |
| 13 | 2 | D | 0.97 | -29.016 |
| 13 | 2 | D | 1.14 | -29.411 |
| 13 | 2 | D | NA | -29.774 |
| 13 | 2 | D | 0.94 | -29.53 |
| 13 | 2 | D | NA | -29.62 |
| 13 | 2 | D | NA | -30.611 |
| 13 | 2 | D | NA | -28.939 |
| 13 | 2 | D | NA | -30.205 |
| 13 | 2 | D | NA | -29.838 |
| 13 | 2 | D | NA | -30.151 |
| 13 | 2 | D | 1.1 | -30.13 |
| 13 | 2 | D | NA | -29.356 |
| 14 | 2 | D | NA | -29.036 |
| 14 | 2 | D | 1.48 | -28.18 |
| 14 | 2 | D | 1.24 | -28.262 |
| 14 | 2 | D | 1.72 | -28.45 |
| 14 | 2 | D | 1.22 | -28.704 |
| 14 | 2 | D | NA | -28.63 |
| 14 | 2 | D | NA | -28.2 |
| 14 | 2 | D | NA | -29.478 |
| 14 | 2 | D | NA | -28.579 |
| 14 | 2 | D | NA | -29.076 |
| 14 | 2 | D | NA | -29.027 |
| 14 | 2 | D | NA | -28.82 |
| 16 | 2 | D | NA | -28.698 |
| 16 | 2 | D | NA | -28.88 |
| 16 | 2 | D | NA | -28.948 |
| 16 | 2 | D | NA | -28.11 |
| 16 | 2 | D | NA | -29.666 |
| 16 | 2 | D | 1.02 | -28.665 |
| 16 | 2 | D | NA | -28.46 |
| 16 | 2 | D | 1.17 | -28.855 |
| 16 | 2 | D | NA | -27.776 |
| 16 | 2 | D | 1.16 | -28.81 |
| 16 | 2 | D | NA | -28.778 |
| 16 | 2 | D | 1.28 | -29 |
| 17 | 2 | D | NA | -29.931 |
| 17 | 2 | D | NA | -30.39 |
| 17 | 2 | D | NA | -29.677 |
| 17 | 2 | D | 1.06 | -29.525 |
| 17 | 2 | D | NA | -30.501 |
| 17 | 2 | D | 1.33 | -30.517 |
| 17 | 2 | D | 0.99 | -29.908 |
| 17 | 2 | D | NA | -29.887 |
| 17 | 2 | D | NA | -30.15 |
| 17 | 2 | D | NA | -31.322 |
| 17 | 2 | D | NA | -29.73 |
| 19 | 2 | D | NA | -29.181 |
| 19 | 2 | D | NA | -28.596 |
| 19 | 2 | D | NA | -28.888 |
| 19 | 2 | D | NA | -28.664 |
| 19 | 2 | D | 0.97 | NA |
| 19 | 2 | D | 1.08 | -28.256 |
| 19 | 2 | D | NA | -30.15 |
| 19 | 2 | D | NA | -29.328 |
| 19 | 2 | D | NA | -28.869 |
| 19 | 2 | D | 1.37 | NA |
| 19 | 2 | D | 1.3 | -28.583 |
| 19 | 2 | D | NA | -29.438 |
| 1 | 2 | N | 1.19 | -29.152 |
| 1 | 2 | N | NA | -28.413 |
| 1 | 2 | N | NA | -28.884 |
| 1 | 2 | N | NA | -28.934 |
| 1 | 2 | N | NA | -29.39 |
| 1 | 2 | N | 1.53 | -29.196 |
| 1 | 2 | N | NA | -28.969 |
| 1 | 2 | N | 1.55 | -28.286 |
| 1 | 2 | N | NA | -28.776 |
| 1 | 2 | N | 1.21 | -28.474 |
| 1 | 2 | N | NA | -28.768 |
| 1 | 2 | N | NA | -29.491 |
| 11 | 2 | N | NA | -28.691 |
| 11 | 2 | N | 1.41 | -30.938 |
| 11 | 2 | N | 1.54 | NA |
| 11 | 2 | N | NA | -29.45 |
| 11 | 2 | N | NA | -29.5 |
| 11 | 2 | N | NA | -28.606 |
| 11 | 2 | N | NA | -28.61 |
| 11 | 2 | N | NA | -29.654 |
| 11 | 2 | N | 1.57 | -28.536 |
| 11 | 2 | N | NA | -28.723 |
| 11 | 2 | N | 1.38 | -29.43 |
| 13 | 2 | N | NA | -29.781 |
| 13 | 2 | N | NA | -28.78 |
| 13 | 2 | N | 1.44 | -29.855 |
| 13 | 2 | N | NA | -29.46 |
| 13 | 2 | N | NA | -30.472 |
| 13 | 2 | N | NA | -30.003 |
| 13 | 2 | N | 1.44 | -29.792 |
| 13 | 2 | N | NA | -29.676 |
| 13 | 2 | N | 1.49 | -29.85 |
| 13 | 2 | N | NA | -28.914 |
| 13 | 2 | N | NA | -29.462 |
| 13 | 2 | N | 1.07 | -29.89 |
| 14 | 2 | N | NA | -29.131 |
| 14 | 2 | N | NA | -28.781 |
| 14 | 2 | N | NA | -29.062 |
| 14 | 2 | N | NA | -28.588 |
| 14 | 2 | N | NA | -28.97 |
| 14 | 2 | N | NA | -28.418 |
| 14 | 2 | N | 1.33 | -28.499 |
| 14 | 2 | N | NA | -28.463 |
| 14 | 2 | N | 1.55 | -29.168 |
| 14 | 2 | N | 1.37 | -28.23 |
| 14 | 2 | N | 1.54 | -27.879 |
| 14 | 2 | N | NA | -28.2 |
| 16 | 2 | N | 1.14 | -29.492 |
| 16 | 2 | N | NA | -28.92 |
| 16 | 2 | N | NA | -27.807 |
| 16 | 2 | N | NA | -28.377 |
| 16 | 2 | N | 1.58 | -29.208 |
| 16 | 2 | N | NA | -28.156 |
| 16 | 2 | N | NA | -28.87 |
| 16 | 2 | N | 1.26 | -28.684 |
| 16 | 2 | N | NA | -28.902 |
| 16 | 2 | N | NA | -28.167 |
| 16 | 2 | N | NA | -29.392 |
| 16 | 2 | N | 1.18 | -29.22 |
| 17 | 2 | N | NA | -29.941 |
| 17 | 2 | N | 1.25 | -29.231 |
| 17 | 2 | N | NA | -29.961 |
| 17 | 2 | N | NA | -29.739 |
| 17 | 2 | N | 1.72 | -29.419 |
| 17 | 2 | N | NA | -30.71 |
| 17 | 2 | N | NA | -29.608 |
| 17 | 2 | N | NA | -30.523 |
| 17 | 2 | N | 1.62 | -30.271 |
| 17 | 2 | N | NA | -29.995 |
| 17 | 2 | N | 1.43 | -30.964 |
| 19 | 2 | N | 1.32 | -28.968 |
| 19 | 2 | N | NA | -28.697 |
| 19 | 2 | N | NA | -29.096 |
| 19 | 2 | N | NA | -29.218 |
| 19 | 2 | N | NA | -28.986 |
| 19 | 2 | N | NA | -28.374 |
| 19 | 2 | N | 0.87 | -28.77 |
| 19 | 2 | N | NA | -29.536 |
| 19 | 2 | N | 1.25 | -27.929 |
| 19 | 2 | N | 1.07 | -28.451 |
| 1 | 2 | ND | 0.99 | -29.02 |
| 1 | 2 | ND | NA | -29.079 |
| 1 | 2 | ND | 1.34 | -29.12 |
| 1 | 2 | ND | NA | -28.798 |
| 1 | 2 | ND | 1.54 | -29.144 |
| 1 | 2 | ND | NA | -29.15 |
| 1 | 2 | ND | NA | -28.829 |
| 1 | 2 | ND | NA | -28.846 |
| 1 | 2 | ND | 1.13 | -27.681 |
| 1 | 2 | ND | NA | -28.676 |
| 1 | 2 | ND | NA | -29.41 |
| 1 | 2 | ND | NA | -28.809 |
| 11 | 2 | ND | 0.97 | NA |
| 11 | 2 | ND | NA | -29.16 |
| 11 | 2 | ND | NA | -28.593 |
| 11 | 2 | ND | NA | -29.26 |
| 11 | 2 | ND | NA | -28.813 |
| 11 | 2 | ND | NA | -28.692 |
| 11 | 2 | ND | NA | -30.096 |
| 11 | 2 | ND | NA | -29.125 |
| 11 | 2 | ND | 1.59 | -28.56 |
| 11 | 2 | ND | 1.41 | NA |
| 11 | 2 | ND | NA | -29.301 |
| 13 | 2 | ND | NA | -29.446 |
| 13 | 2 | ND | NA | -28.821 |
| 13 | 2 | ND | NA | -30 |
| 13 | 2 | ND | NA | -29.07 |
| 13 | 2 | ND | 1.49 | -29.015 |
| 13 | 2 | ND | 1.75 | -28.87 |
| 13 | 2 | ND | 1.18 | -29.702 |
| 13 | 2 | ND | NA | -28.772 |
| 13 | 2 | ND | NA | -29.81 |
| 13 | 2 | ND | NA | -29.967 |
| 13 | 2 | ND | NA | -28.947 |
| 13 | 2 | ND | 1.37 | -29.045 |
| 14 | 2 | ND | NA | -28.407 |
| 14 | 2 | ND | NA | -29.924 |
| 14 | 2 | ND | 1.19 | -28.19 |
| 14 | 2 | ND | 2.14 | -28.457 |
| 14 | 2 | ND | NA | -29.532 |
| 14 | 2 | ND | NA | -27.95 |
| 14 | 2 | ND | 1.65 | -28.572 |
| 14 | 2 | ND | NA | -27.756 |
| 14 | 2 | ND | 1.92 | -28.591 |
| 14 | 2 | ND | NA | -28.217 |
| 14 | 2 | ND | NA | -28.85 |
| 14 | 2 | ND | NA | -28.312 |
| 16 | 2 | ND | NA | -28.849 |
| 16 | 2 | ND | NA | -28.629 |
| 16 | 2 | ND | 1 | -29.126 |
| 16 | 2 | ND | 1.12 | -27.966 |
| 16 | 2 | ND | 0.99 | -28.38 |
| 16 | 2 | ND | NA | -29.164 |
| 16 | 2 | ND | NA | -29.218 |
| 16 | 2 | ND | 0.94 | -28.478 |
| 16 | 2 | ND | NA | -29.468 |
| 16 | 2 | ND | NA | -28.487 |
| 16 | 2 | ND | NA | -29.438 |
| 16 | 2 | ND | NA | -28.449 |
| 17 | 2 | ND | NA | -29.038 |
| 17 | 2 | ND | 1.23 | -29.946 |
| 17 | 2 | ND | 1.66 | -29.66 |
| 17 | 2 | ND | NA | -30.282 |
| 17 | 2 | ND | NA | -28.116 |
| 17 | 2 | ND | NA | -29.256 |
| 17 | 2 | ND | 1.55 | -29.845 |
| 17 | 2 | ND | NA | -29.168 |
| 17 | 2 | ND | NA | -28.549 |
| 17 | 2 | ND | 1.62 | -29.733 |
| 17 | 2 | ND | NA | -28.607 |
| 17 | 2 | ND | NA | -29.04 |
| 19 | 2 | ND | NA | -28.922 |
| 19 | 2 | ND | NA | -28.603 |
| 19 | 2 | ND | NA | -29.123 |
| 19 | 2 | ND | NA | -28.886 |
| 19 | 2 | ND | 0.85 | -29.112 |
| 19 | 2 | ND | 1.26 | -28.093 |
| 19 | 2 | ND | 1.23 | -29.544 |
| 19 | 2 | ND | NA | -29.177 |
| 19 | 2 | ND | NA | -29.326 |
| 19 | 2 | ND | NA | -28.29 |

References

1. Marcos, E.; Calvo, L.; Marcos, J.A.; Taboada, A.; Tarrega, R. Tree effects on the chemical topsoil features of oak, beech and pine forests. *Eur. J. For. Res*. **2010**, *129*, 25–30.
2. Rivas*-*Martinez, S. Estudio de la vegetacion y flora de las Sierras de Guadarrama y Gredos. *An. del Inst. Bot. A.J. Cavanilles* **1963**, *21*, 5–330.
